# Supplementary material for: Modelling biocide and herbicide concentrations in catchments of the Rhine basin
Source: Copernicus journal article supplement (doi:10.5194/hess-2017-628), 2017-11-02
Supplement: Supplementary file 1 [file hess-2017-628-supplement.pdf]

# **Modelling biocide and herbicide concentrations in catchments of the Rhine basin**

## **Supplementary material**

Andreas Moser<sup>1</sup>, Devon Wemyss<sup>1#</sup>, Fabrizio Fenicia<sup>1</sup>, Mark Honti<sup>2</sup>, Ruth Scheidegger<sup>1</sup>, Christian Stamm<sup>1\*</sup>

<sup>1</sup> Eawag: Swiss Federal Institute of Aquatic Science and Technology, Dübendorf, Switzerland

<sup>2</sup> MTA-BME Water Research Group, Hungarian Academy of Sciences, Budapest, Hungary

<sup>#</sup> Current address: ZHAW School of Management and Law, Winterthur, 8400, Switzerland

\* Corresponding author: christian.stamm@eawag.ch

# Content:

---

## **Part I: Model description**

A1: CrossWater model framework

A2: Conceptual model of the spatial representation.

## **Part II: Input data, study area**

A3: Model compounds

A4: Data sources for weather and discharge data

A5: Maps of the source areas

A6: Statistical relationships between population density, façade area and roof areas

A7: Overview about the calibration and validation catchments

A8: Prior distributions for the model parameters

A9: River segments for the Aquasim application

## **Part III: Results**

A10: Calibrated model parameters

A11: Time-series of predicted and observed concentrations

A12: Cumulative distributions of predicted and observed concentrations

A13: Statistical metrics of model performance

References

## Part I: Model description

### Appendix A1: CrossWater model framework

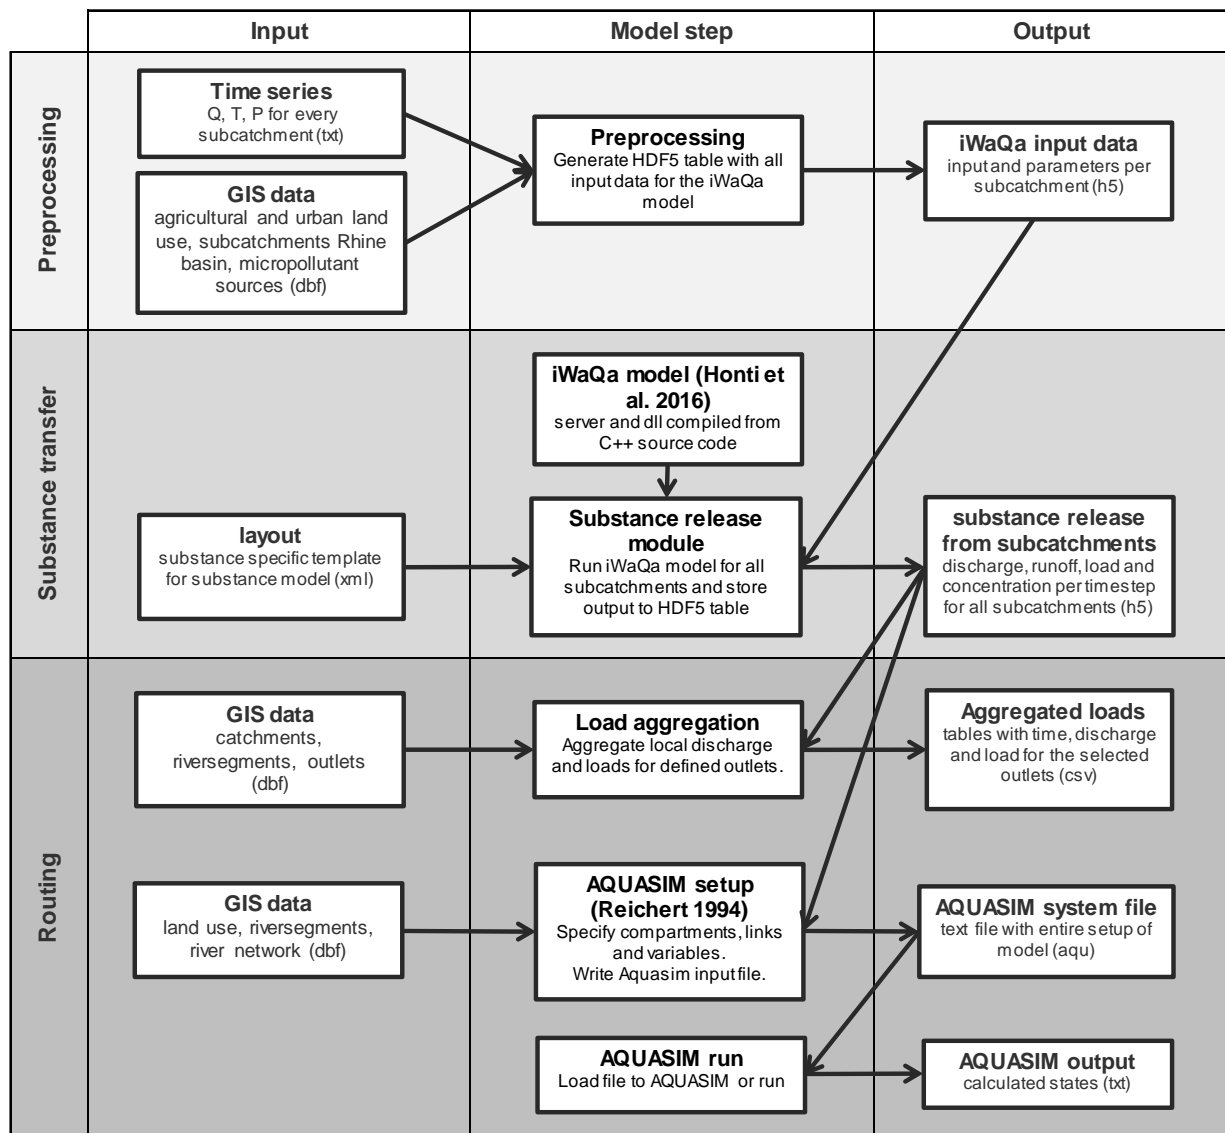

Figure S1 : Flow chart of CrossWater framework to model herbicide and biocide concentrations in the Rhine basin. (txt): text file, (csv): CSV-formatted text file, (dbf): dBASE database file, (h5): Hierarchical Data Format HDF5, (aqu): AQUASIM job file

## Appendix A2: Conceptual model of the spatial representation

Due to the usage of CCM2 subcatchments (Vogt et al., 2007) and the aggregation procedure to guarantee a reasonable minimal subcatchment area as described in the main text, not all joints of the hydrologic tree were preserved. To tackle this, we conceptually differentiate between catchments that don't have any lateral inputs (e.g. headwaters or higher order streams sections without tributaries) and the inter-catchment areas (see Figure S2). Mass transfer from both classes of subcatchments is simulated the same way. For simulating herbicide losses however, there is a slight difference in that for catchments the driving force is the (observed) discharge at the catchment outlet (see below), while for inter-catchment areas lateral discharge has to be determined in another way (as outlined below).

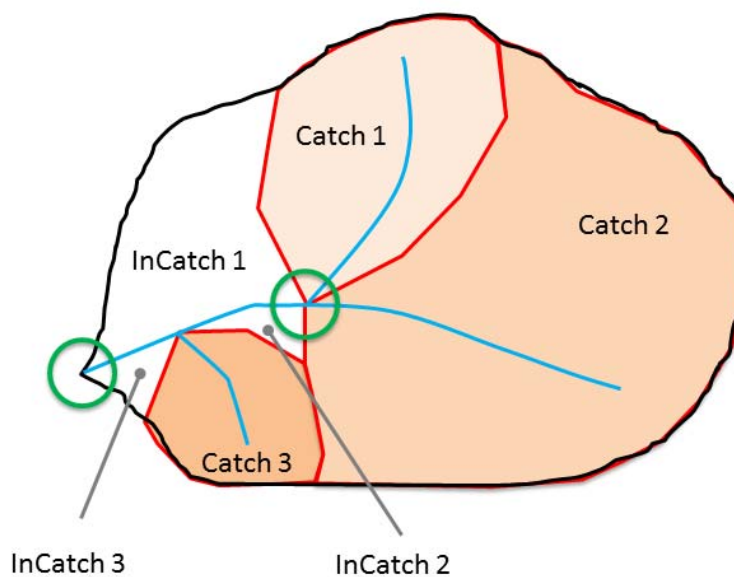

Figure S2: Schematic representation of the spatial units covering the basin. The example basin consists of the three catchment areas Catch 1 to Catch 3 and three inter-catchment areas.

## Appendix A3: Model compounds

Table S1 : Characterisation of the model compounds. Sources: <http://gestis.itrust.de> (last access: 8. Aug. 2017).

| Compound      | Use                     | CAS No     | Log K <sub>ow</sub> | Structure                                                                             |
|---------------|-------------------------|------------|---------------------|---------------------------------------------------------------------------------------|
| Carbendazim   | Biocide,<br>(herbicide) | 10605-21-7 | 1.43                | 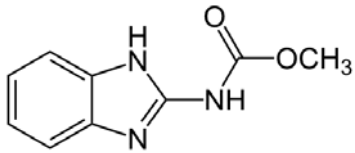   |
| Diuron        | Biocide,<br>(herbicide) | 330-54-1   | 2.78                |   |
| Isoproturon   | Herbicide               | 34123-59-6 | 2.87                |  |
| S-Metolachlor | Herbicide               | 87392-12-9 | 3.13                |  |
| Terbutylazine | Herbicide               | 5915-41-3  | 3.06                |   |

## Appendix A4: Data sources of discharge, precipitation and temperature

Table S2 : Discharge, precipitation and temperature data sources for the Rhine basin

| Germany                                                                              | Switzerland                                                                    | Other                                                                             |
|--------------------------------------------------------------------------------------|--------------------------------------------------------------------------------|-----------------------------------------------------------------------------------|
| <b>Discharge</b>                                                                     |                                                                                |                                                                                   |
| Bundesamt für Gewässerkunde                                                          | Bundesamt für Umwelt                                                           | Austria:<br>Amt der Vorarlberger<br>Landesregierung                               |
| Landesamt für Umwelt- und<br>Arbeitsschutz Saarland                                  | Departement Bau, Verkehr und<br>Umwelt Aargau                                  | France:<br>Ministry of Ecology,<br>Sustainable Development and<br>Energy          |
| Bayerisches Landesamt für<br>Umwelt                                                  | Amt für Wasser und Abfall des<br>Kantons Bern                                  | Luxembourg:<br>Administration de la Gestion de<br>l'Eau                           |
| Landesamt für Natur, Umwelt<br>und Verbraucherschutz<br>Nordrhein-Westfalen          | Amt für Umweltschutz und<br>Energie Basel-Land                                 |                                                                                   |
| Hessisches Landesamt für<br>Umwelt und Geologie                                      | Amt für Natur und Umwelt<br>Graubünden                                         |                                                                                   |
| Landesanstalt für Umwelt,<br>Messungen und Naturschutz<br>Baden Württemberg          | Umwelt und Energie Luzern                                                      |                                                                                   |
| Landesamt für Umwelt,<br>Wasserwirtschaft und<br>Gewerbeaufsicht Rheinland-<br>Pfalz | Département du développement<br>territorial et de l'environnement<br>Neuchâtel |                                                                                   |
| Thüringer Landesanstalt für<br>Umwelt und Geologie                                   | Amt für Umwelt St. Gallen                                                      |                                                                                   |
|                                                                                      | Amt für Umwelt Solothurn                                                       |                                                                                   |
|                                                                                      | Amt für Umwelt Thurgau                                                         |                                                                                   |
|                                                                                      | Amt für Abfall, Wasser<br>Energie und Luft Zürich                              |                                                                                   |
|                                                                                      | Département du territoire et de<br>l'environnement Waadt                       |                                                                                   |
| <b>Precipitation</b>                                                                 |                                                                                |                                                                                   |
| Deutscher Wetterdienst,<br>RADOLAN                                                   | MeteoSwiss, CombiPrecip                                                        | Luxembourg:<br>Atlas hydro-climatologique du<br>Grand-Duché de Luxembourg<br>2010 |
| Deutscher Wetterdienst,<br>Stationen                                                 |                                                                                |                                                                                   |
| <b>Temperature</b>                                                                   |                                                                                |                                                                                   |
|                                                                                      | MeteoSwiss, TabsD                                                              | EU:<br>European Climate Assessment<br>& Dataset, E-OBS                            |

## Appendix A5:

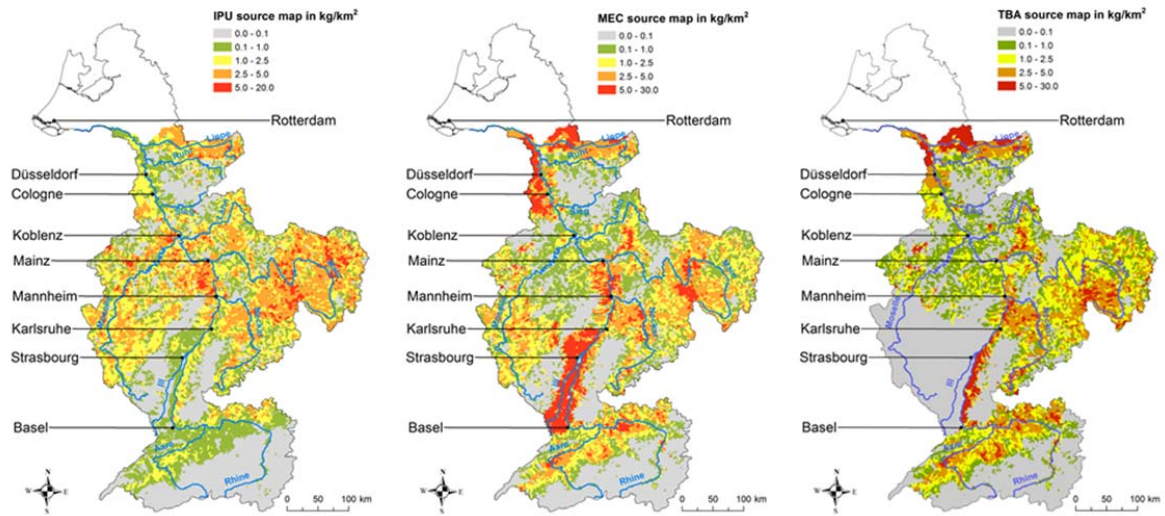

Figure S3: Spatial distribution of the herbicide applications across the Rhine basin. IPU: isoproturon, MEC: S-metolachlor, TBA: terbuthylazine. (Base data: (Eurostat, 2011;European Environment Agency EEA, 2012;Swisstopo, 2007;Swiss Federal Office for the Environment (FOEN), 2012;Swiss Federal Statistical Office FSO, 2012, 2011;Vogt et al., 2007)

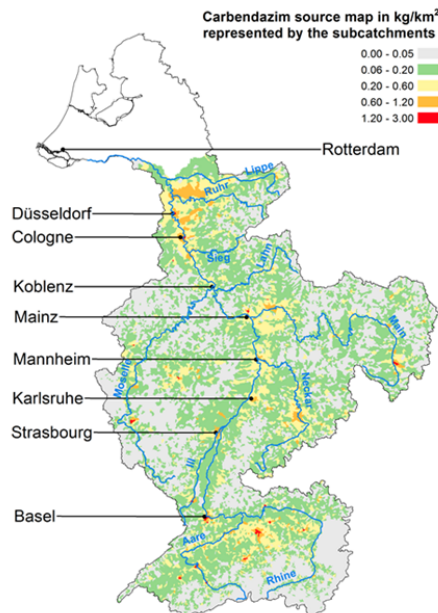

Figure S4: Spatial distribution of the carbendazim applications across the Rhine basin. The spatial pattern for diuron is the same because of the absence of spatially distributed input data. (Base data: (Swiss Federal Office for the Environment (FOEN), 2012;Herlyn and Maurer,

2007;European Environment Agency EEA, 2012;Eurostat, 2011;Vogt et al., 2007;Swisstopo, 2007).

**Appendix A6: Statistical relationships between footprint of buildings, population density and area of facades in Switzerland.**

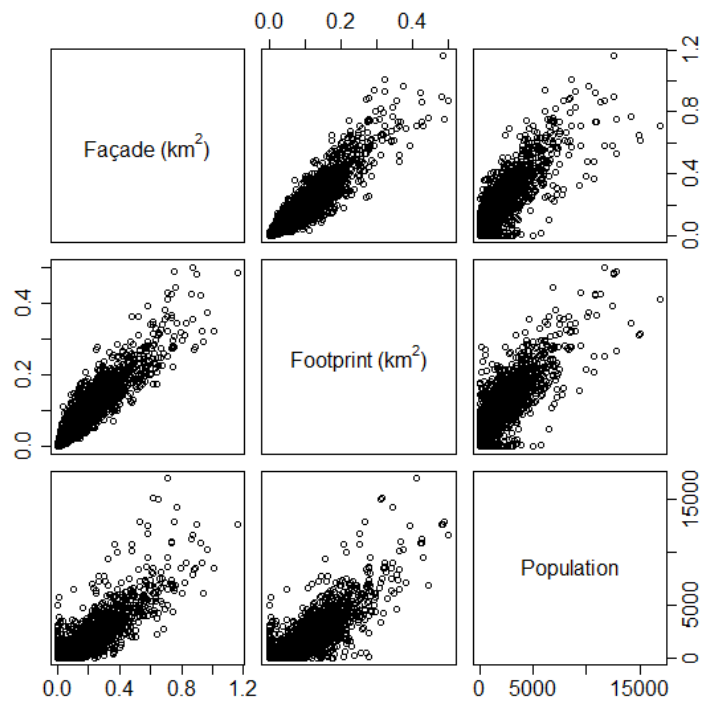

Figure S5: Relations between façade, footprint and population in the subcatchments of Switzerland



## Appendix A7: Calibration, validation and prediction sites

Table S3 : Characterization of calibration, validation and prediction catchments

| Catchment/ River             | Abbr.   | Reference           | IPU   | TBA   | CBZ | DIU | MCP | Year | Area [km <sup>2</sup> ] | agricultural land use [km <sup>2</sup> ] | housing [km <sup>2</sup> ] | population |
|------------------------------|---------|---------------------|-------|-------|-----|-----|-----|------|-------------------------|------------------------------------------|----------------------------|------------|
| <b>Calibration</b>           |         |                     |       |       |     |     |     |      |                         |                                          |                            |            |
| Ossingen                     | oss     | Doppler et al. 2012 | x     | x     |     |     |     | 2009 | 1.2                     | 1.1                                      | -                          | -          |
| Summerau                     | sum     | Freitas et al. 2008 |       |       |     |     |     | 2003 | 0.5                     | 0.04                                     | -                          | -          |
| Moenchaltdorf                | moe     | Wittmer et al. 2010 | x     |       | x   | x   | x   | 2007 | 24.6                    | 4.7                                      | 0.5                        | 12'000     |
| <b>Validation</b>            |         |                     |       |       |     |     |     |      |                         |                                          |                            |            |
| Furtbach                     | fch     | NAWA SPEZ           | x     | x     | x   | x   | x   | 2012 | 31                      | 14                                       | 1.6                        | 31'570     |
| Limpach                      | lch     | NAWA SPEZ           | x     | x     | x   | x   | x   | 2012 | 74                      | 43                                       | 1                          | 7'560      |
| Mentue                       | mnt     | NAWA SPEZ           | x     | x     | x   | x   | x   | 2012 | 100                     | 42                                       | 1                          | 9'300      |
| Salmsacher Aach              | smr     | NAWA SPEZ           | x     | x     | x   | x   | x   | 2012 | 54                      | 33                                       | 1.7                        | 17'326     |
| Surb                         | srb     | NAWA SPEZ           | x     | x     | x   | x   | x   | 2012 | 68                      | 36                                       | 1.4                        | 22'780     |
| Thur                         | thr     | NADUF               | x     |       | x   | x   | x   | 2009 | 1'735                   | 873                                      | 33                         | 403'028    |
| Toess                        | tss     | NADUF               | x     |       | x   | x   | x   | 2009 | 432                     | 175                                      | 11                         | 197'032    |
| Glatt                        | glt     | NADUF               | x     |       | x   | x   | x   | 2009 | 413                     | 183                                      | 20                         | 405'702    |
| Murg                         | mrg     | NADUF               | x     |       | x   | x   | x   | 2009 | 212                     | 118                                      | 5.3                        | 68'145     |
| Sitter                       | str     | NADUF               | x     |       | x   | x   | x   | 2009 | 96                      | 21                                       | 0.9                        | 9'704      |
| Rhine-Reckingen              | rhn-rkg | NADUF               | x     |       | x   | x   | x   | 2009 | 14'721                  | 5'261                                    | 175                        | 2'946'907  |
| Rhine-Basel                  | imrs    | IMRS                | x     | x     | x   | x   | x   | 2011 | 35'899                  | 12'009                                   | 503                        | 7'786'398  |
| <b>Validation/Prediction</b> |         |                     |       |       |     |     |     |      |                         |                                          |                            |            |
| Aare                         | are     |                     | ( x ) | ( x ) |     |     |     | 2011 | 17'623                  | 5'399                                    | 270                        | 3'957'080  |
| Neckar                       | nkr     |                     | ( x ) | ( x ) |     |     |     | 2011 | 13'897                  | 5'536                                    | 318                        | 5'787'797  |
| Main                         | man     |                     | ( x ) | ( x ) |     |     |     | 2011 | 27'235                  | 11'450                                   | 466                        | 7'194'708  |
| Moselle                      | msl     |                     | ( x ) | ( x ) |     |     |     | 2011 | 28'199                  | 12'152                                   | 347                        | 4'646'691  |
| Rhine-Lobith                 | rhn-lbt | ICPR                | x     | ( x ) |     |     |     | 2011 | 160'221                 | 64'574                                   | 3028                       | 50'210'696 |

x modelled and validated

( x ) only prediction

## Appendix A8: Calibration of the herbicide substance transfer module

Table S4 : Prior distributions for the calibration of the herbicide substance transfer module

| <b>parameter</b>        | <b>distribution</b> | <b>unit</b>      |      | <b>isoproturon</b> | <b>metolachlor</b> | <b>terbuthylazine</b> |
|-------------------------|---------------------|------------------|------|--------------------|--------------------|-----------------------|
| $\rho$                  | uniform             | -                | mean | 0.068              | 0.422              | 0.200                 |
|                         |                     |                  | max  | 1                  | 1                  | 1                     |
|                         |                     |                  | min  | 0                  | 0                  | 0                     |
| $k_d, k_{\text{error}}$ | lognormal           | 1/d              | mean | 0.00924            | 0.0077016          | 0.0315                |
|                         |                     |                  | stdv | 0.01               | 0.01               | 0.01                  |
| $k_{w-s}$               | uniform             | 1/d              | mean | 0.027              | 0.03               | 0.05                  |
|                         |                     |                  | max  | 1                  | 1                  | 1                     |
|                         |                     |                  | min  | 1.00E-20           | 1.00E-20           | 1.00E-20              |
| $k_{s-w}$               | uniform             | 1/d              | mean | 0.00038            | 0.002              | 8.00E-04              |
|                         |                     |                  | max  | 1                  | 1                  | 1                     |
|                         |                     |                  | min  | 1.00E-20           | 1.00E-20           | 1.00E-20              |
| $T_{\text{obj}}$        | normal              | °C               | mean | 200                | 750                | 750                   |
|                         |                     |                  | stdv | 100                | 100                | 100                   |
| $C_{\text{back}}$       | lognormal           | ng/l             | mean | 7                  | 7                  | 5                     |
|                         |                     |                  | stdv | 2                  | 2                  | 2                     |
| $\varepsilon$           | normal              | s/m <sup>2</sup> | mean | 2.30E+07           | 3.17E+07           | 1.29E+09              |
|                         |                     |                  | stdv | 2.16E+07           | 2.45E+07           | 7.18E+08              |
| $\rho_{\text{error}}$   | normal              |                  | mean | 300                | 300                | 300                   |
|                         |                     |                  | stdv | 50                 | 50                 | 50                    |

Table S5: Prior distributions for the biocide substance transfer module.

| <b>parameter</b> | <b>distribution</b> | <b>unit</b> |      | <b>diuron</b> | <b>carbendazim</b> |
|------------------|---------------------|-------------|------|---------------|--------------------|
| $\beta$          | uniform             | mm/d        | mean | 1.18E-04      | 7.35E-05           |
|                  |                     |             | max  | 3.48E-04      | 2.37E-04           |
|                  |                     |             | min  | 1.58E-05      | 7.90E-06           |

## Appendix A9: River segments for the Aquasim application

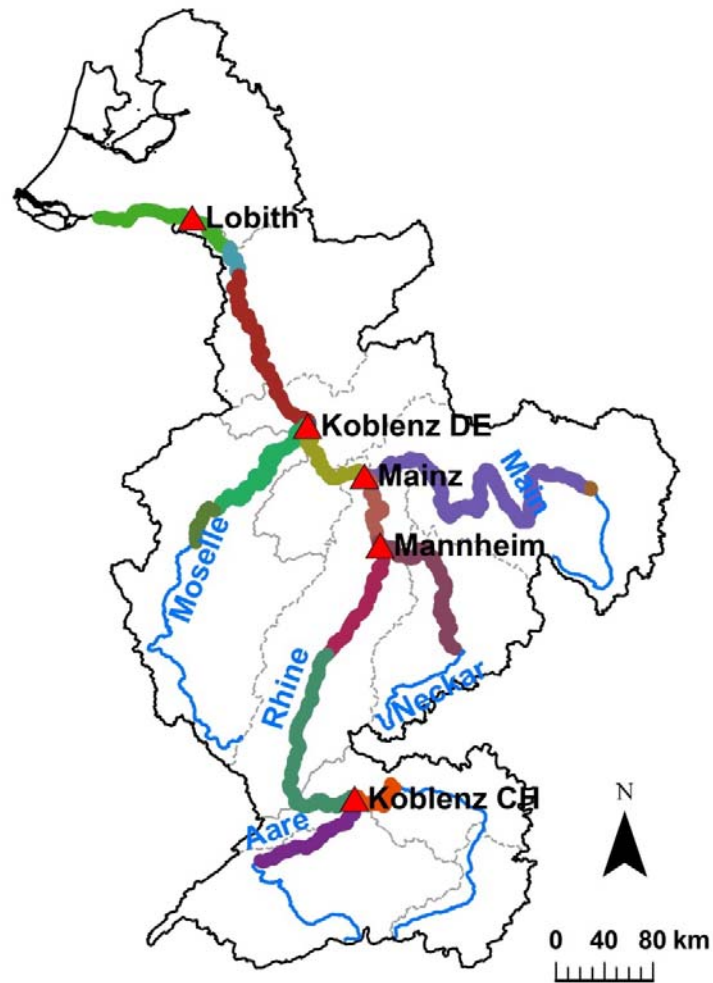

Figure S6 : Rhine basin with subdivisions into the major catchments. The Rhine and the main tributaries are divided into 15 compartments (colored river segments) for the hydraulic routing with AQUASIM. Concentration time series are investigated at the displayed cities along river system. (Base data: GEOSTAT 2011; JRC 2007, 2008; Swisstopo 2007).

## Part III: Results

### Appendix A10: Parameter estimates

Table S6 : Calibrated parameters for the herbicide substance transfer module. Abbreviations for study catchments: moe: Mönchaltorf, oss: Ossingen, sum: Summerau.

| parameter        | unit             | isoproturon |         | metolachlor |         | terbuthylazine |         |
|------------------|------------------|-------------|---------|-------------|---------|----------------|---------|
|                  |                  | moe         | oss     | oss         | summ    | moe            | oss     |
| $\rho$           | -                | 0.45        | 0.08    | 0.52        | 0.86    | 0.95           | 0.02    |
| $k_d$            | 1/d              | 6.6E-03     | 6.0E-03 | 4.7E-03     | 4.8E-03 | 3.0E-02        | 3.0E-02 |
| $k_{w-s}$        | 1/d              | 0.22        | 0.94    | 0.10        | 0.20    | 0.08           | 0.07    |
| $k_{s-w}$        | 1/d              | 9.4E-05     | 2.5E-06 | 5.5E-05     | 2.3E-05 | 4.8E-04        | 2.6E-05 |
| $T_{obj}$        | °C               | 154         | 252*    | 812*        | 576*    | 737            | 812*    |
| $C_{back}$       | ng/l             | 8.1         | 6.4     | 6.7         | 7.0     | 4.6            | 4.7     |
| $\varepsilon$    | s/m <sup>2</sup> | 2.6E+07     | 2.3E+07 | 2.9E+07     | 8.6E+06 | 8.9E+06        | 9.3E+08 |
| $k_{error}$      | 1/d              | 8.8E-04     | 3.5E-03 | 3.4E-03     | 2.0E-03 | 6.8E-03        | 1.3E-02 |
| $\rho_{error}$   | -                | 357         | 311     | 315         | 412     | 458            | 376     |
| $\sigma_{error}$ | -                | 1.31        | 2.45    | 0.78        | 1.17    | 575.87         | 14.21   |

Table S7 : Calibrated parameters for the biocide substance transfer module.

| parameter        | unit | carbendazim | diuron  |
|------------------|------|-------------|---------|
|                  |      | moe         | moe     |
| $\beta$          | mm/d | 5.6E-05     | 8.9E-05 |
| $\sigma_{error}$ | -    | 4.8         | 5.5     |

## Appendix A11: Time-series of observed and calibrated concentrations

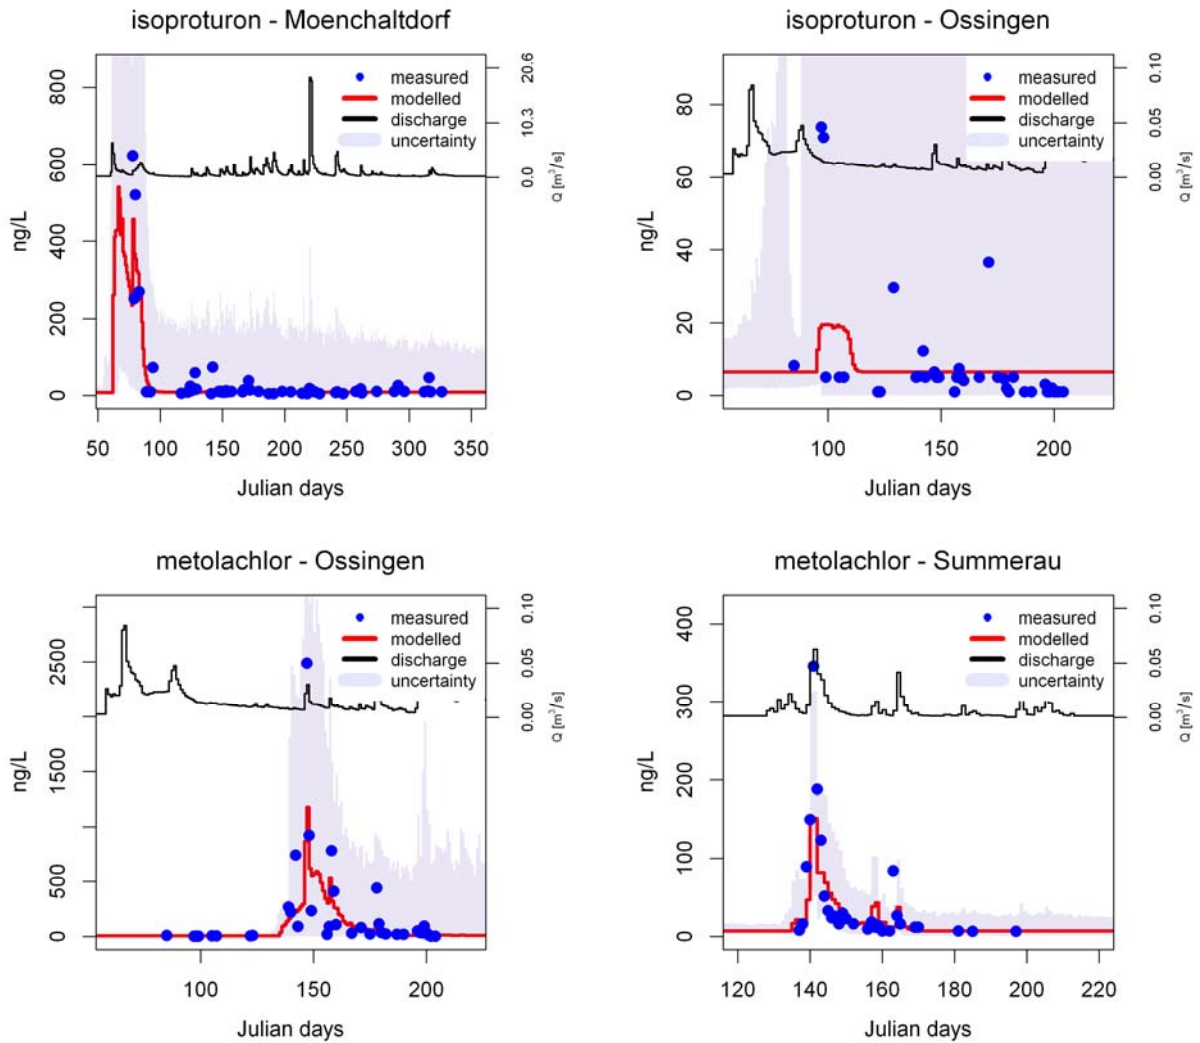

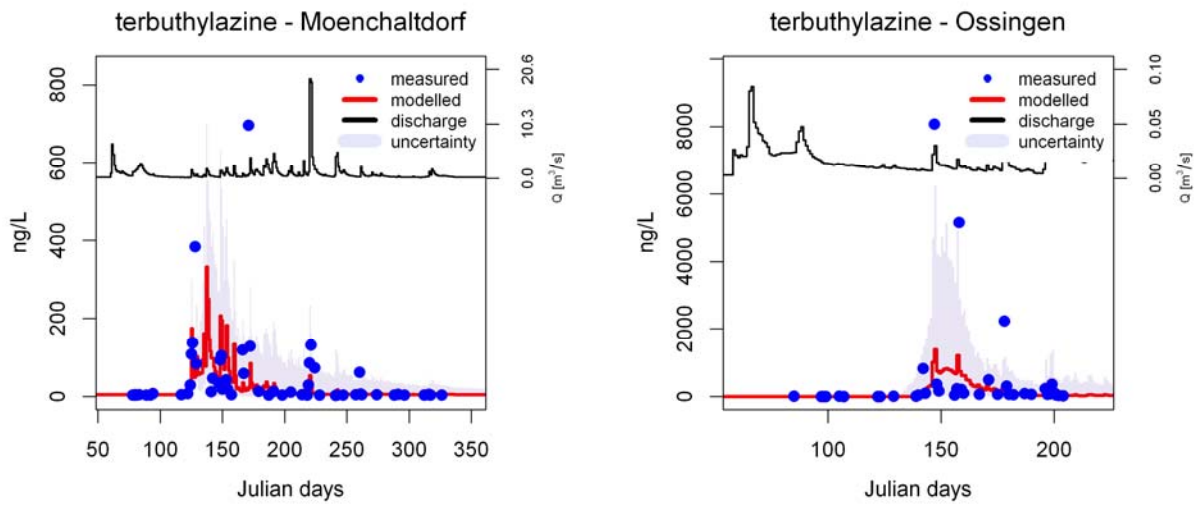

Figure S7 : Measured and modelled herbicide concentrations for the calibration sites. Note that the axis differ for the sites.

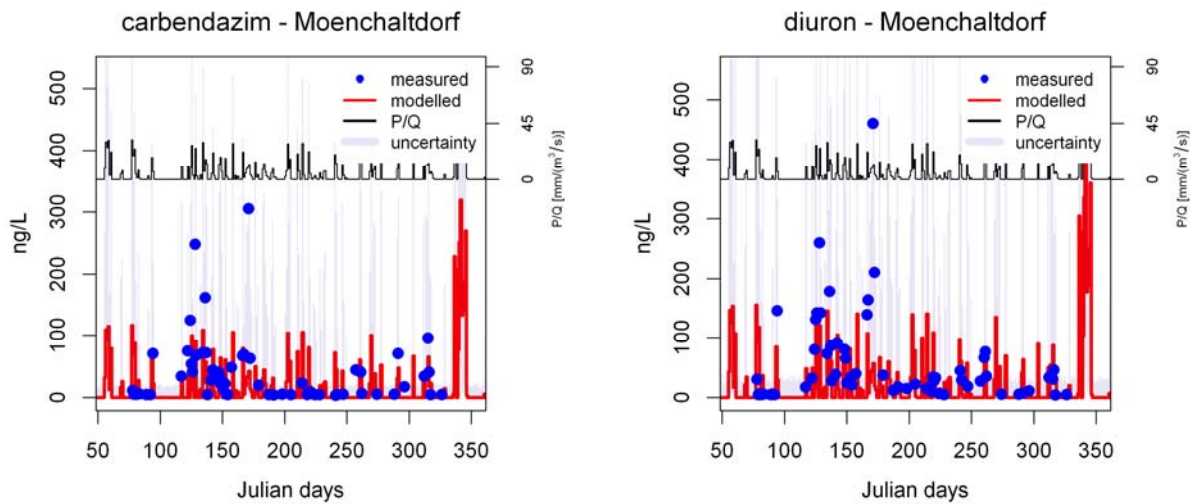

Figure S8 : Measured and modelled biocide concentrations for the calibration sites.

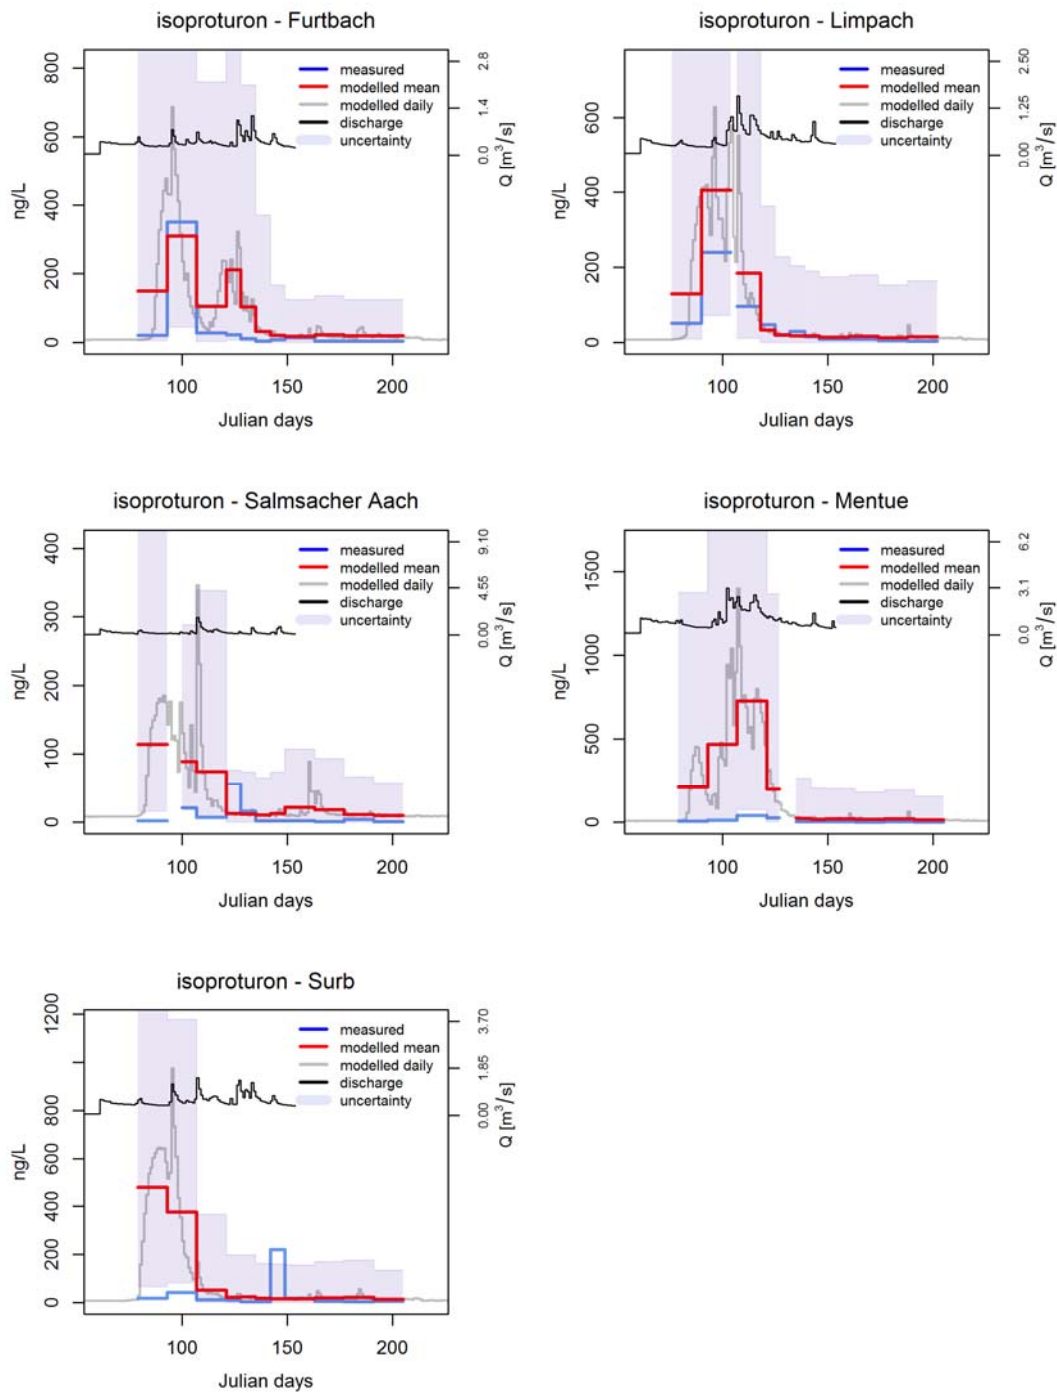

Figure S9 : Validation of the isoproturon predictions with the parameter set calibrated at Mönchaltdorf. Note that the axis differ for the sites.

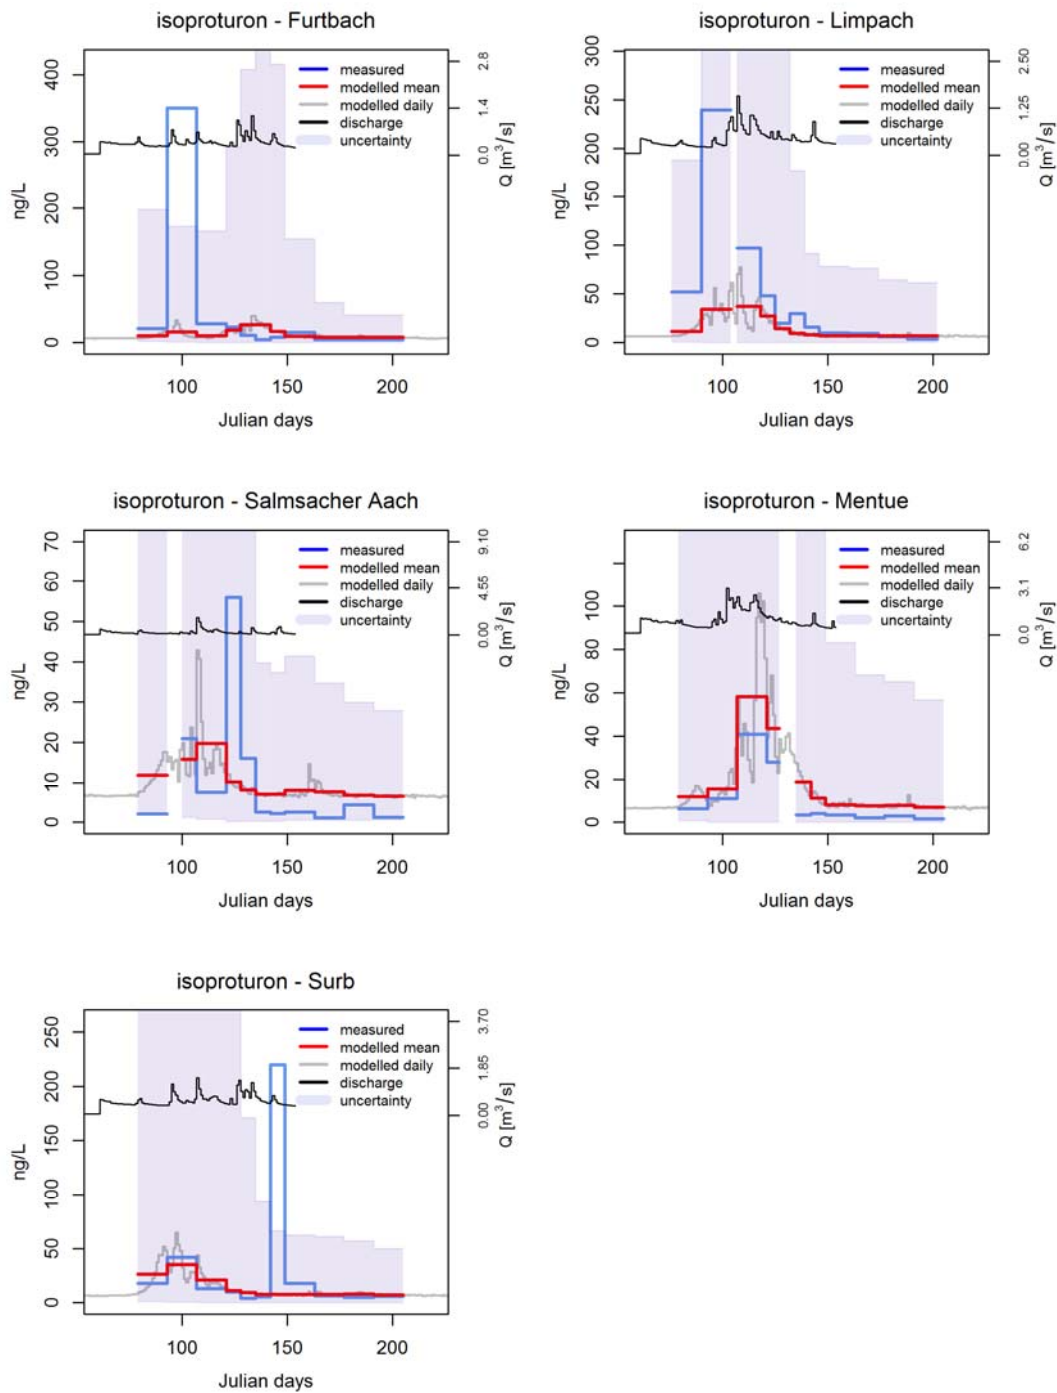

Figure S10 : Validation of the isoproturon predictions with the parameter set calibrated at Ossingen. Note that the axis differ for the sites.



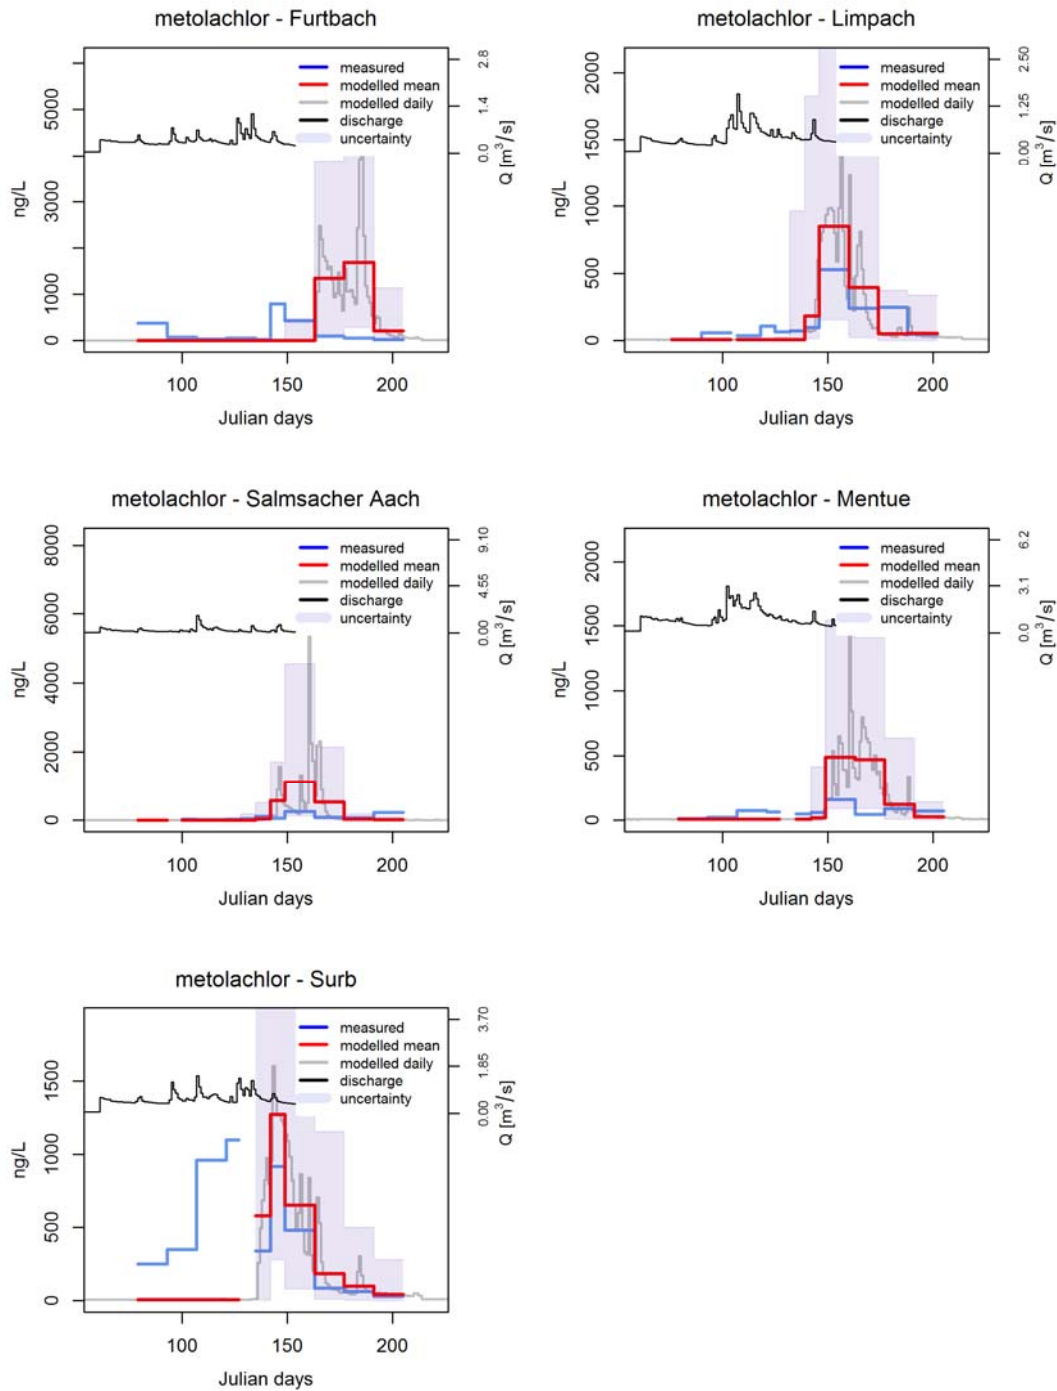

Figure S11 : Validation of the metolachlor predictions with the parameter set calibrated at Ossingen. Note that the axis differ for the sites.

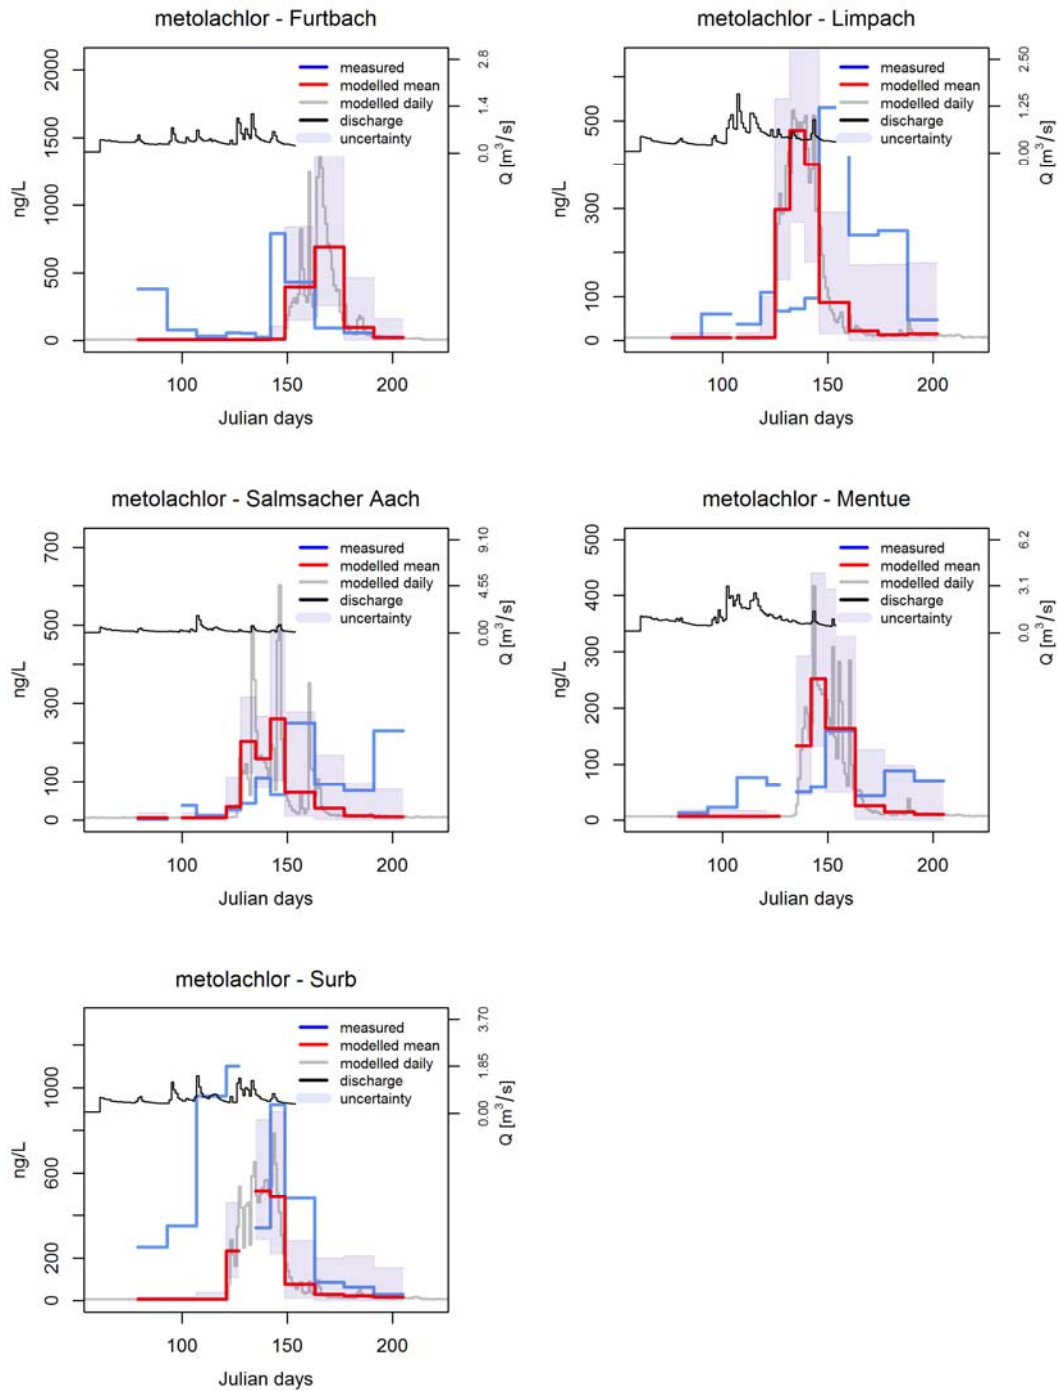

Figure S12 : Validation of the metolachlor predictions with the parameter set calibrated at Summerau. Note that the axis differ for the sites.

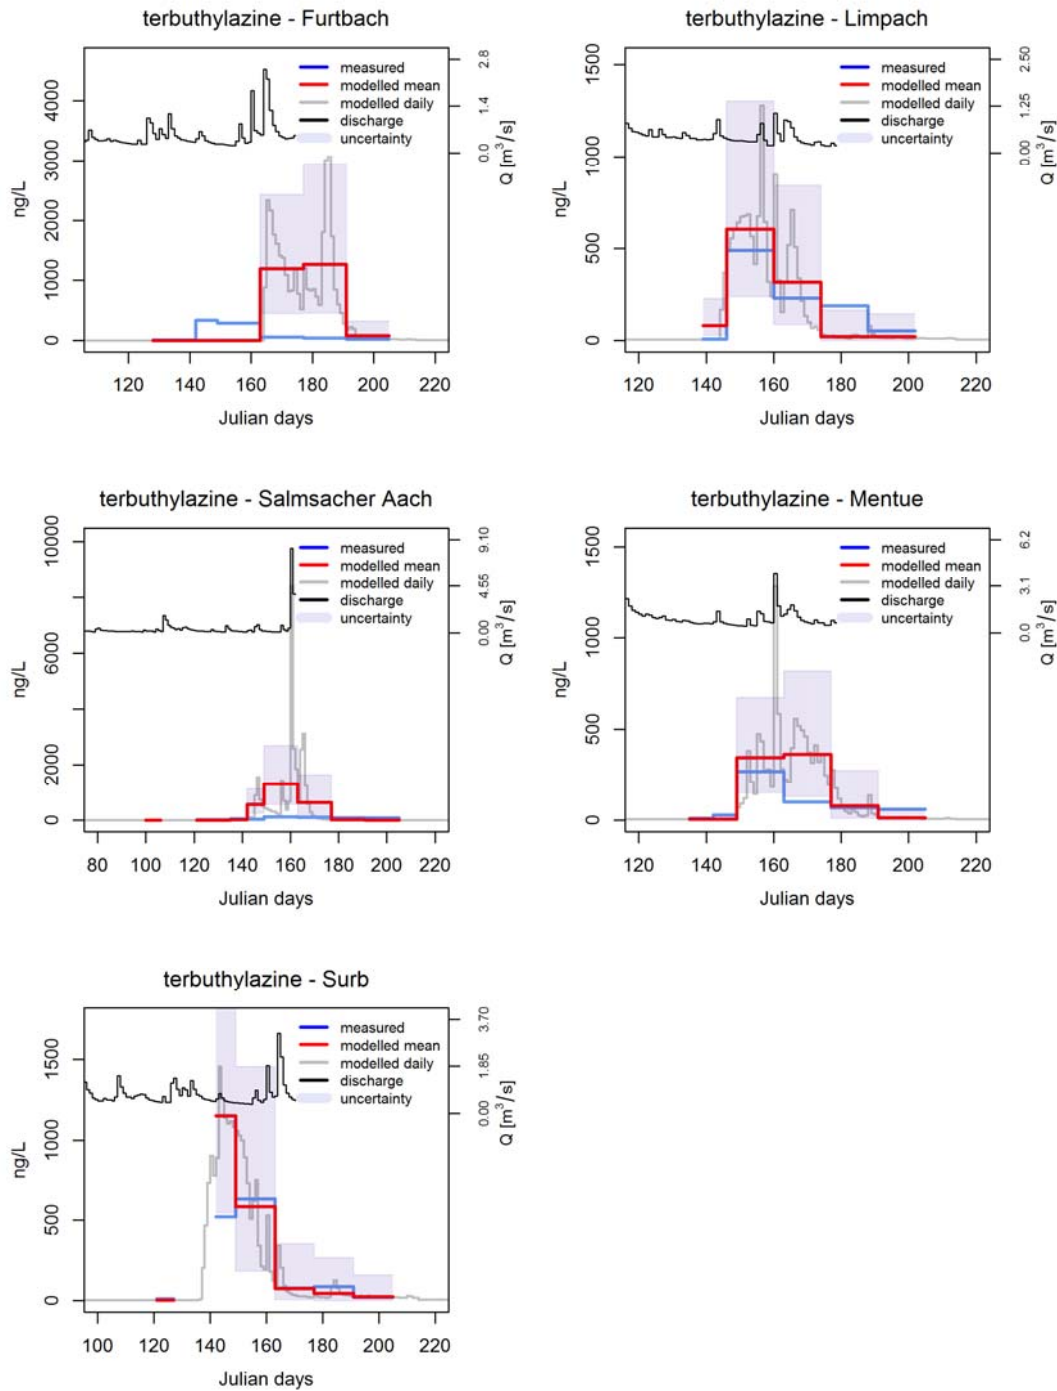

Figure S13 : Validation of the terbuthylazine predictions with the parameter set calibrated at Mönchaldorf. Note that the axis differ for the sites.

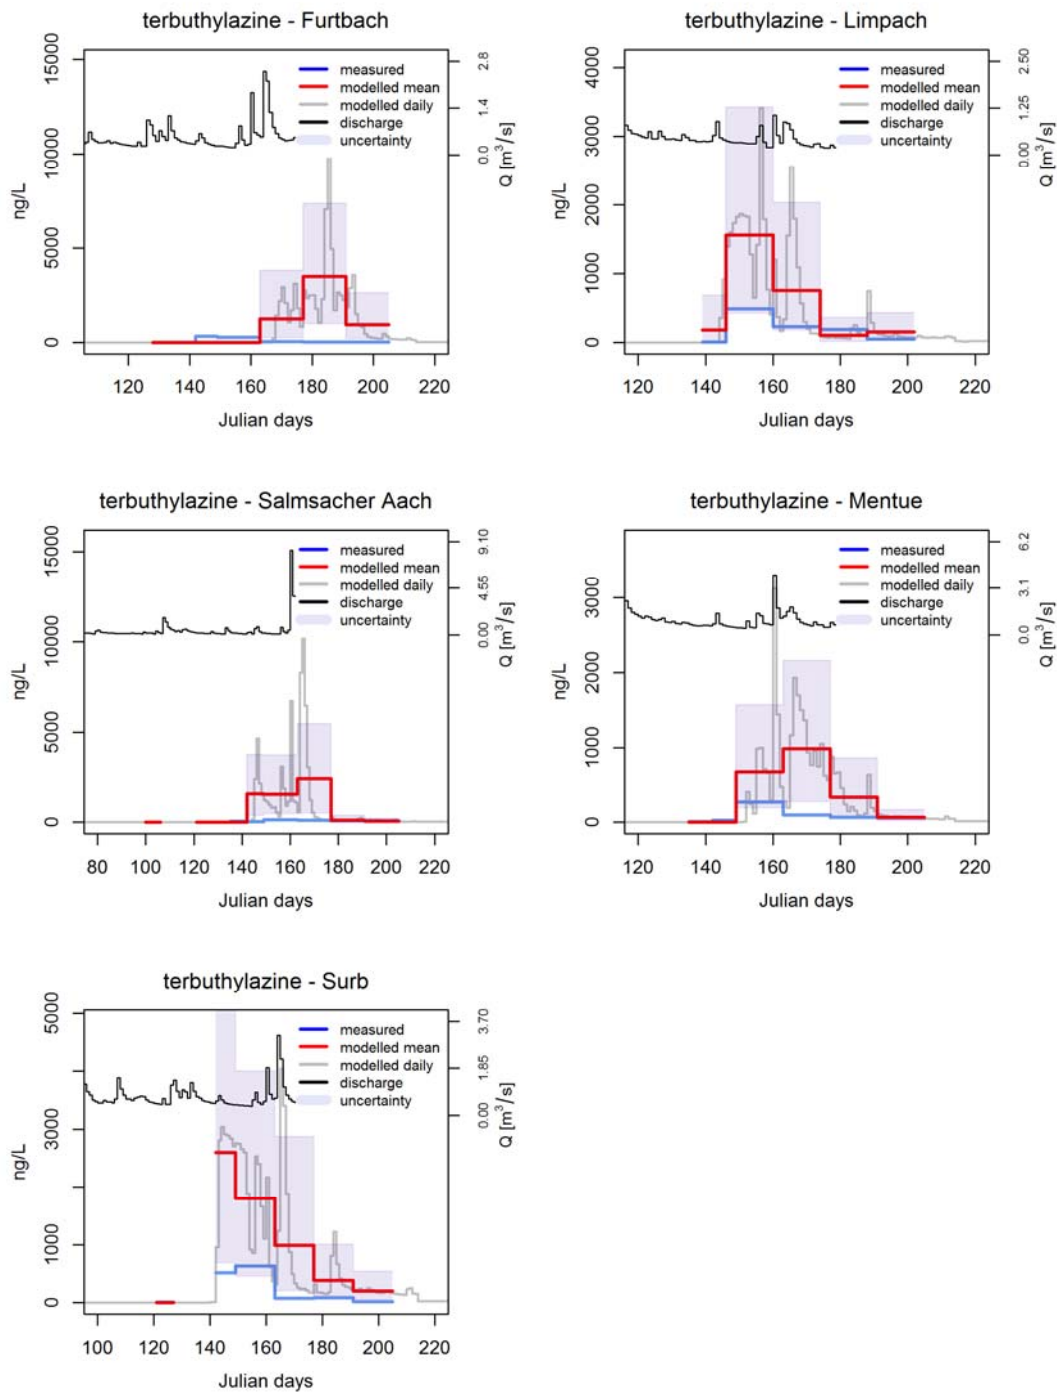

Figure S14 : Validation of the terbuthylazine predictions with the parameter set calibrated at Ossingen. Note that the axis differ for the sites.

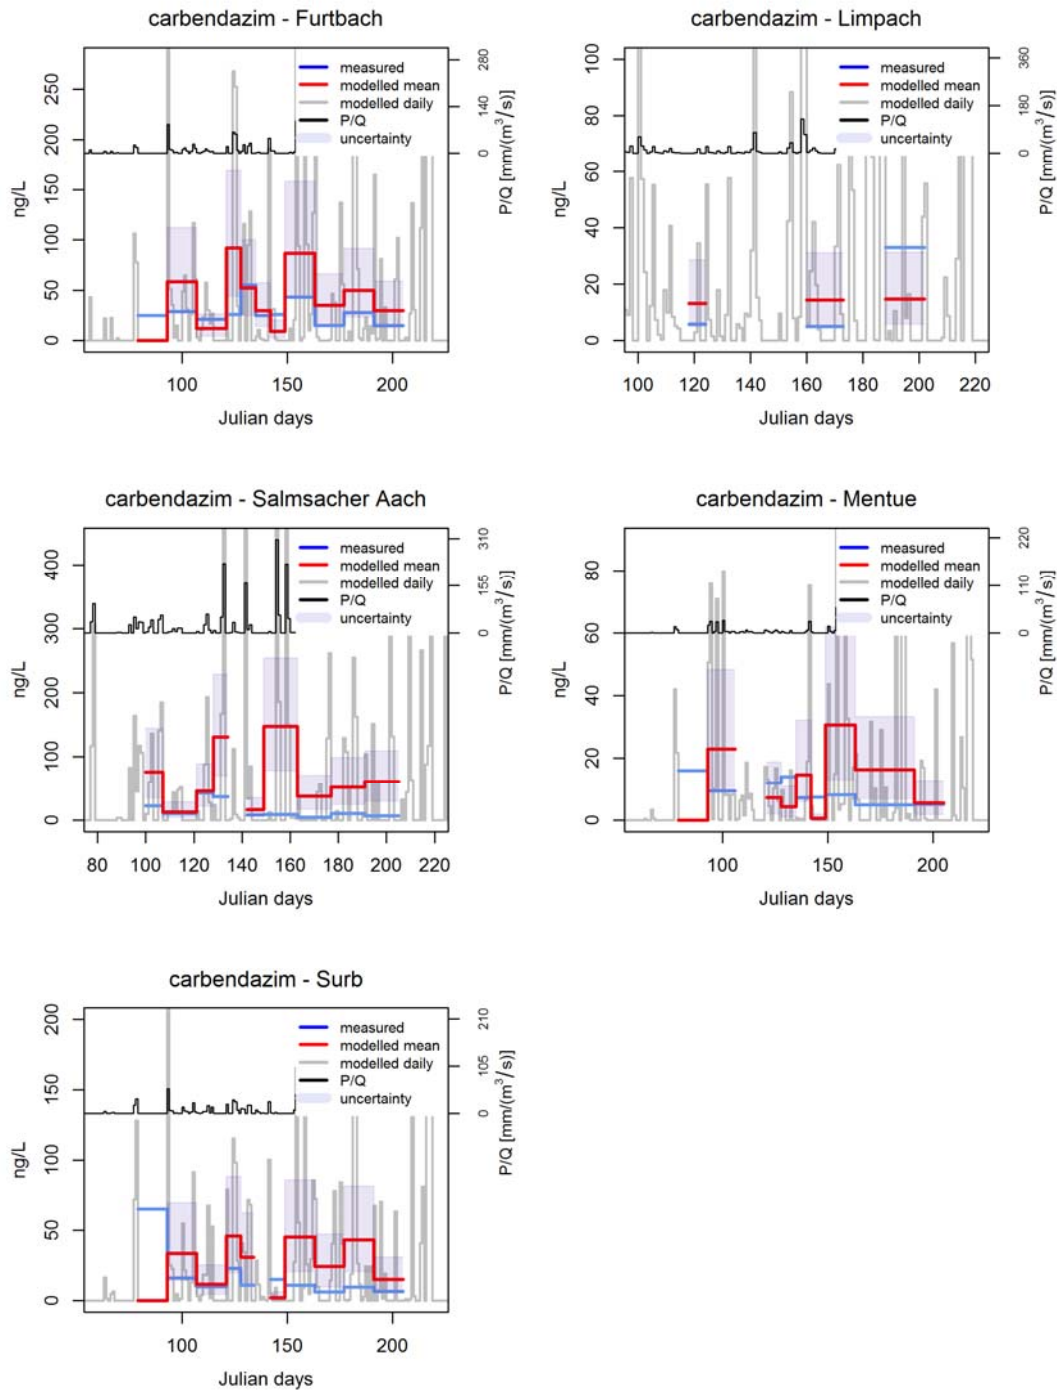

Figure S15 : Validation of the carbendazim predictions with the parameter set calibrated at Mönchaltdorf. Note that the axis differ for the sites.

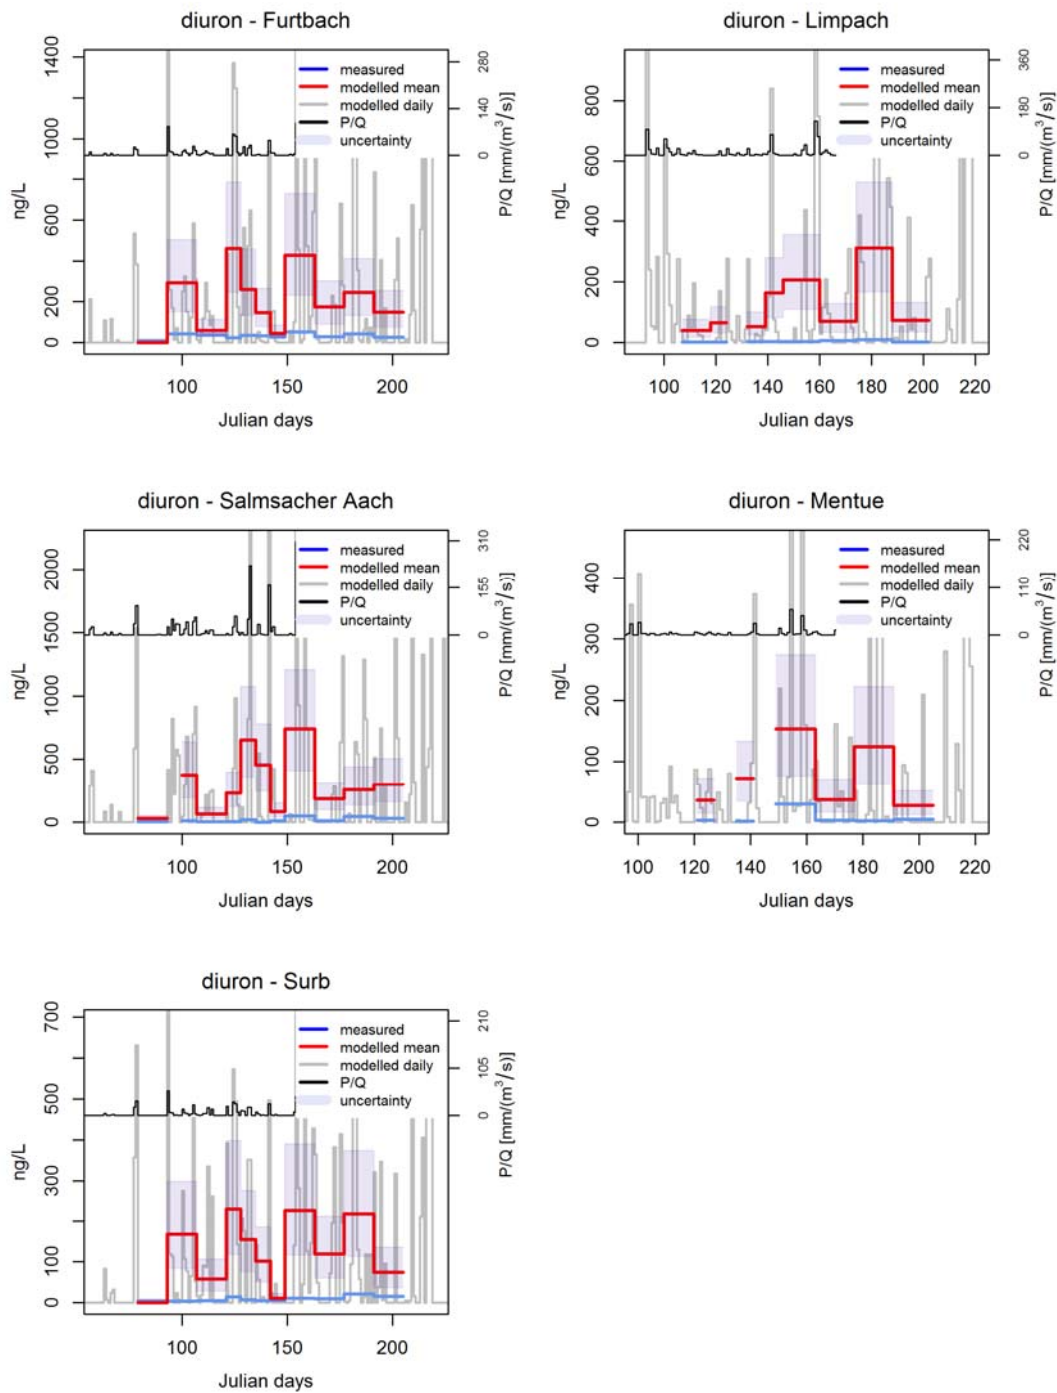

Figure S16 : Validation of the diuron predictions with the parameter set calibrated at Mönchaltdorf. Note that the axis differ for the sites.

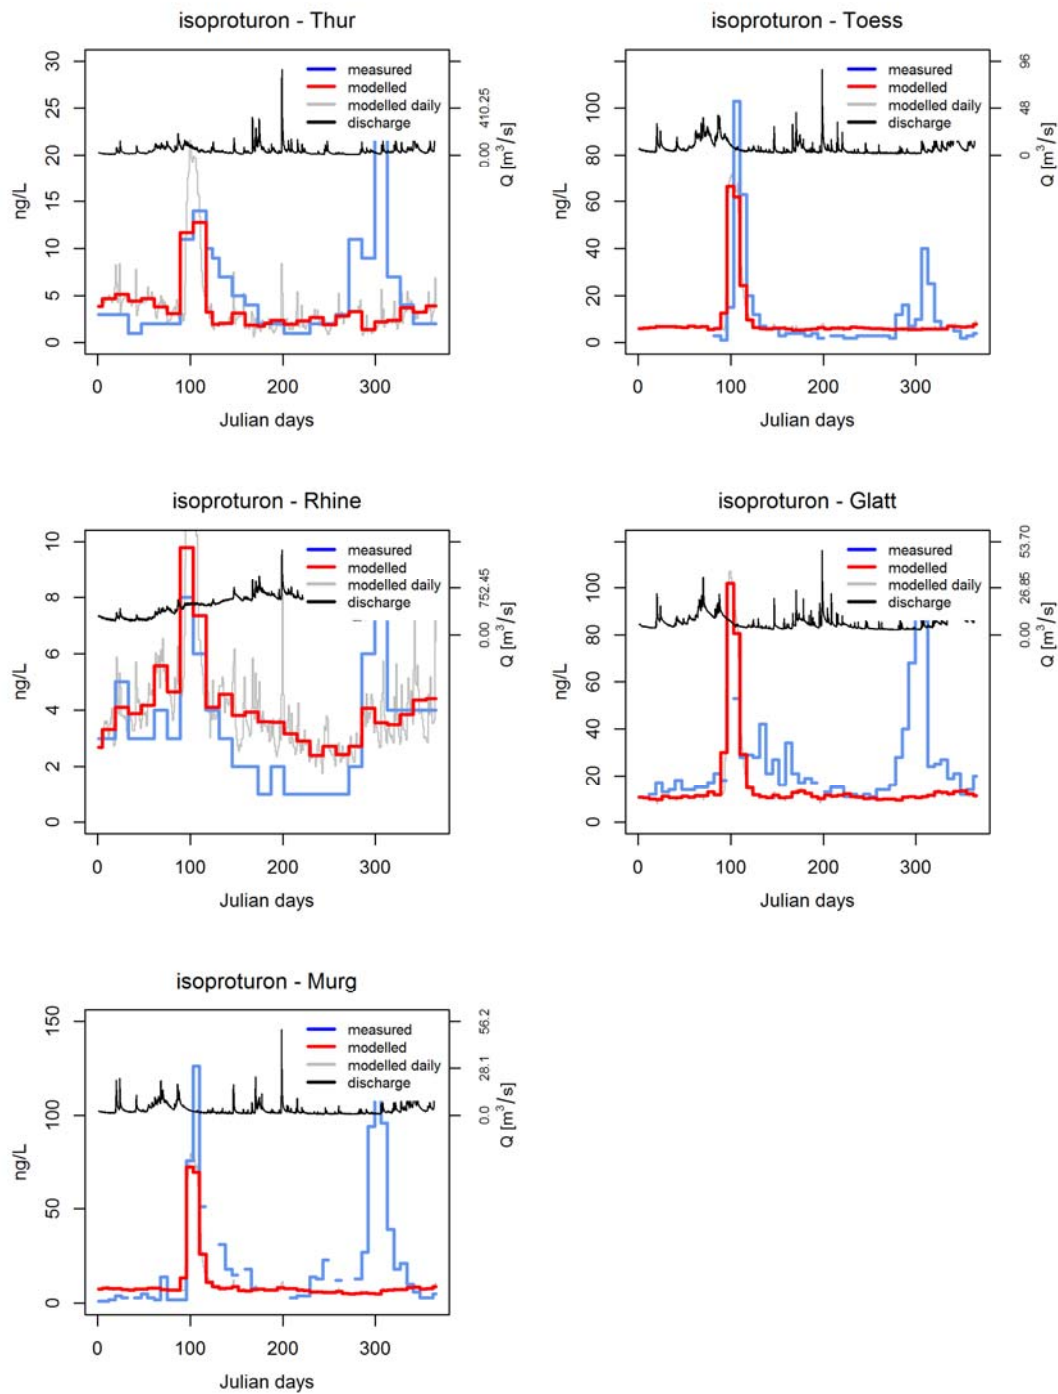

Figure S17 : Validation of isoproturon at the NADUF catchments with the calibrated parameter set from Mönchaldorf. Note that the axis differ for the sites.



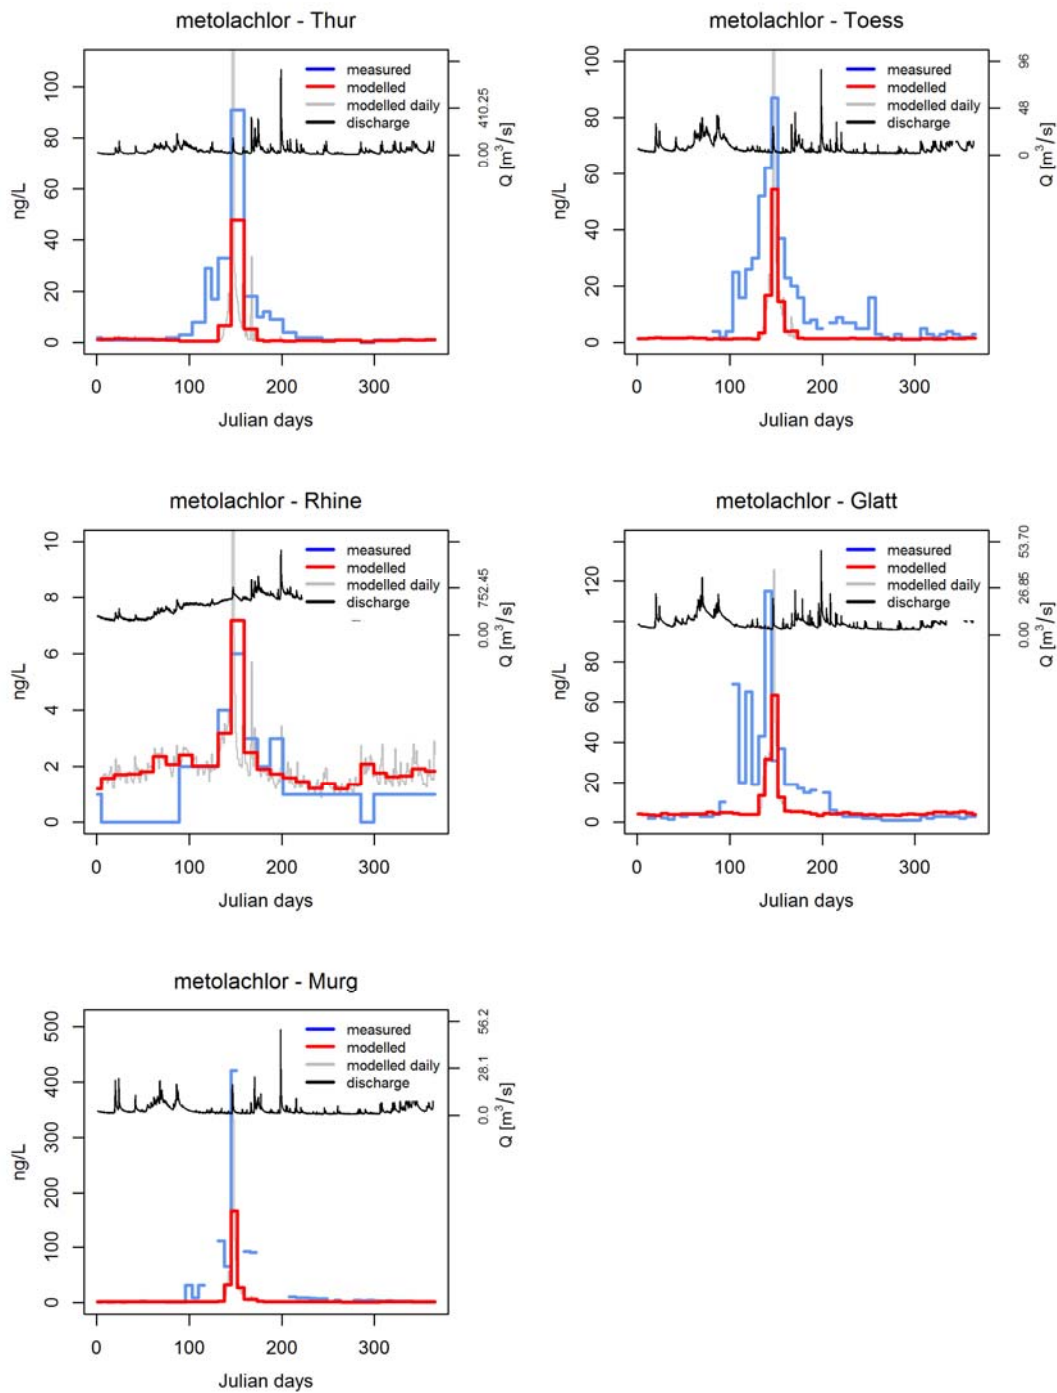

Figure S18 : Validation of metolachlor at the NADUF catchments with the calibrated parameter set from Summerau. Note that the axis differ for the sites.



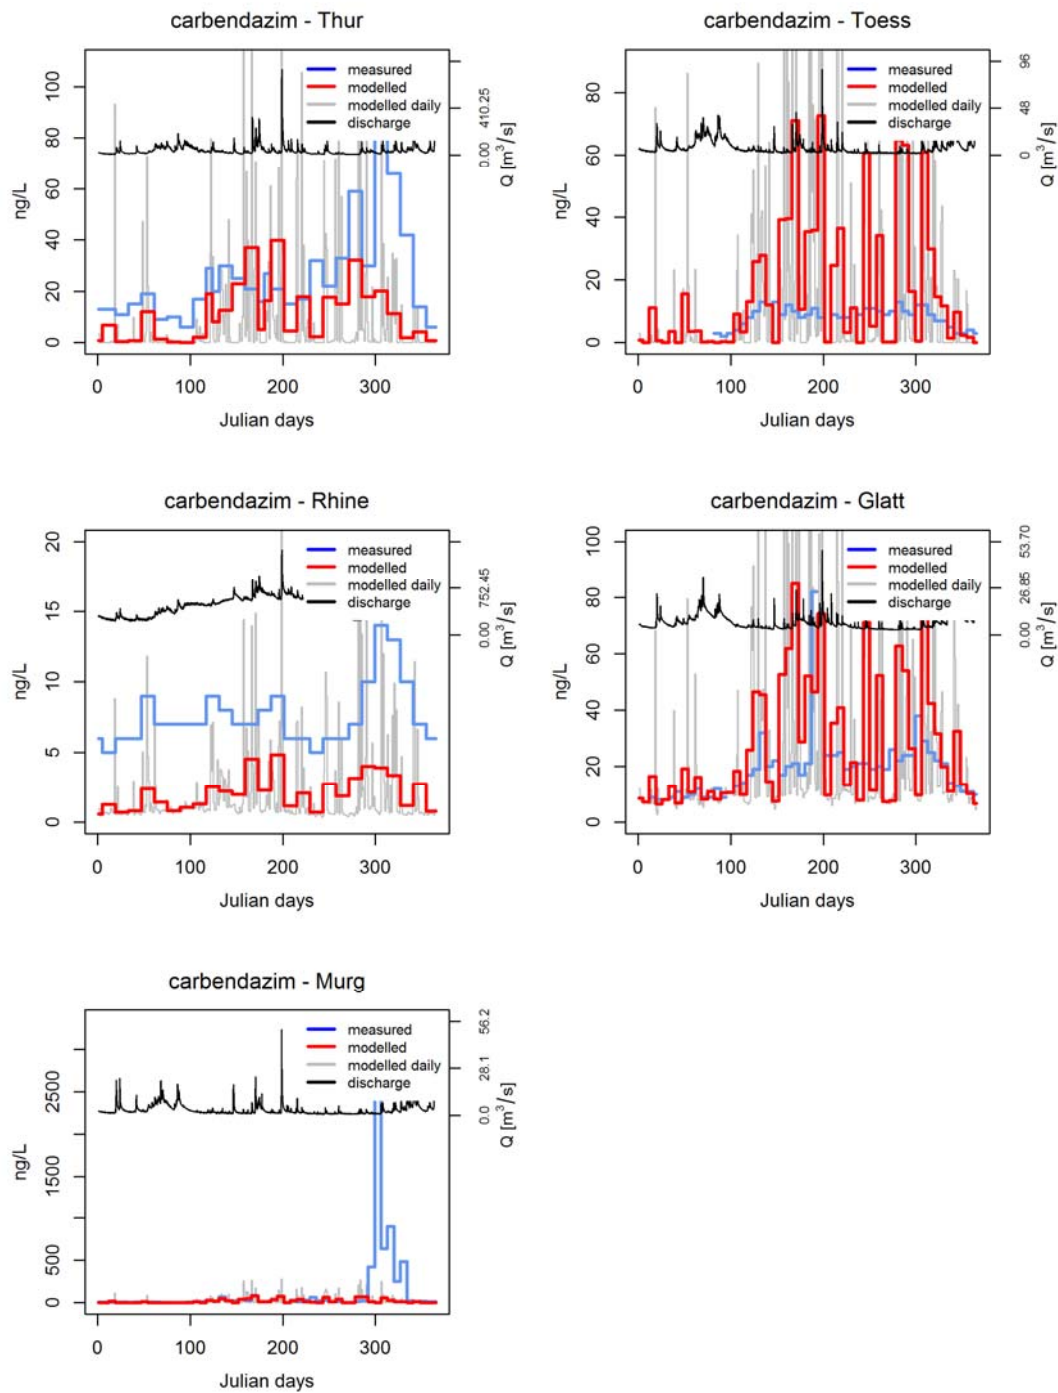

Figure S19 : Validation of carbendazim at the NADUF catchments with the calibrated parameter set from Mönchaltendorf. Note that the axis differ for the sites.

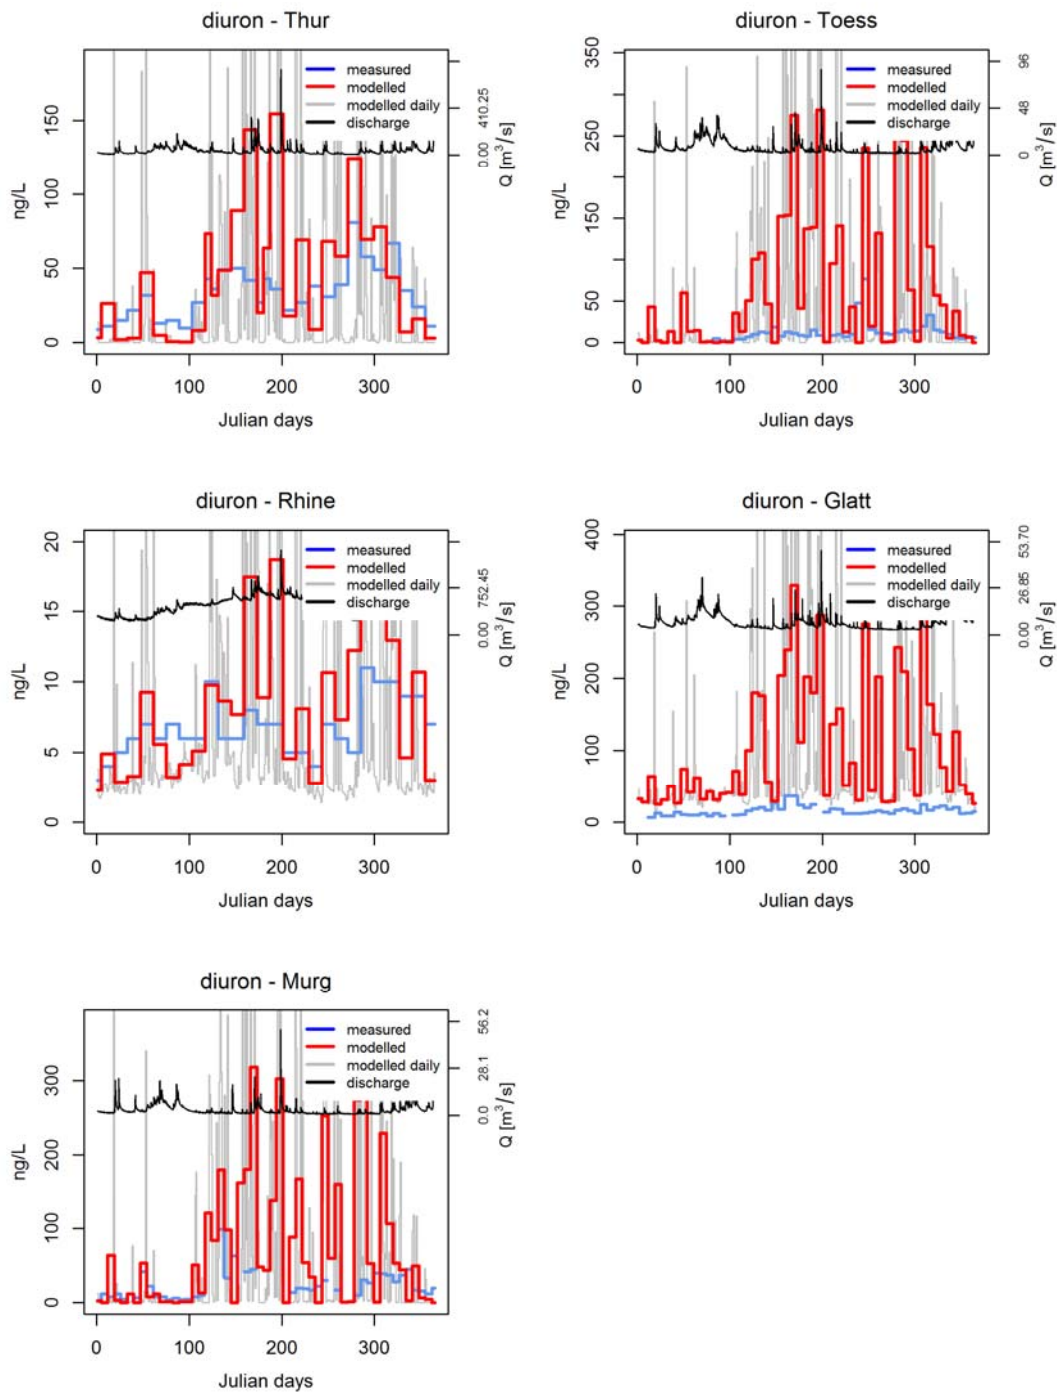

Figure S20 : Validation of diuron at the NADUF catchments with the calibrated parameter set from Mönchaldorf. Note that the axis differ for the sites.

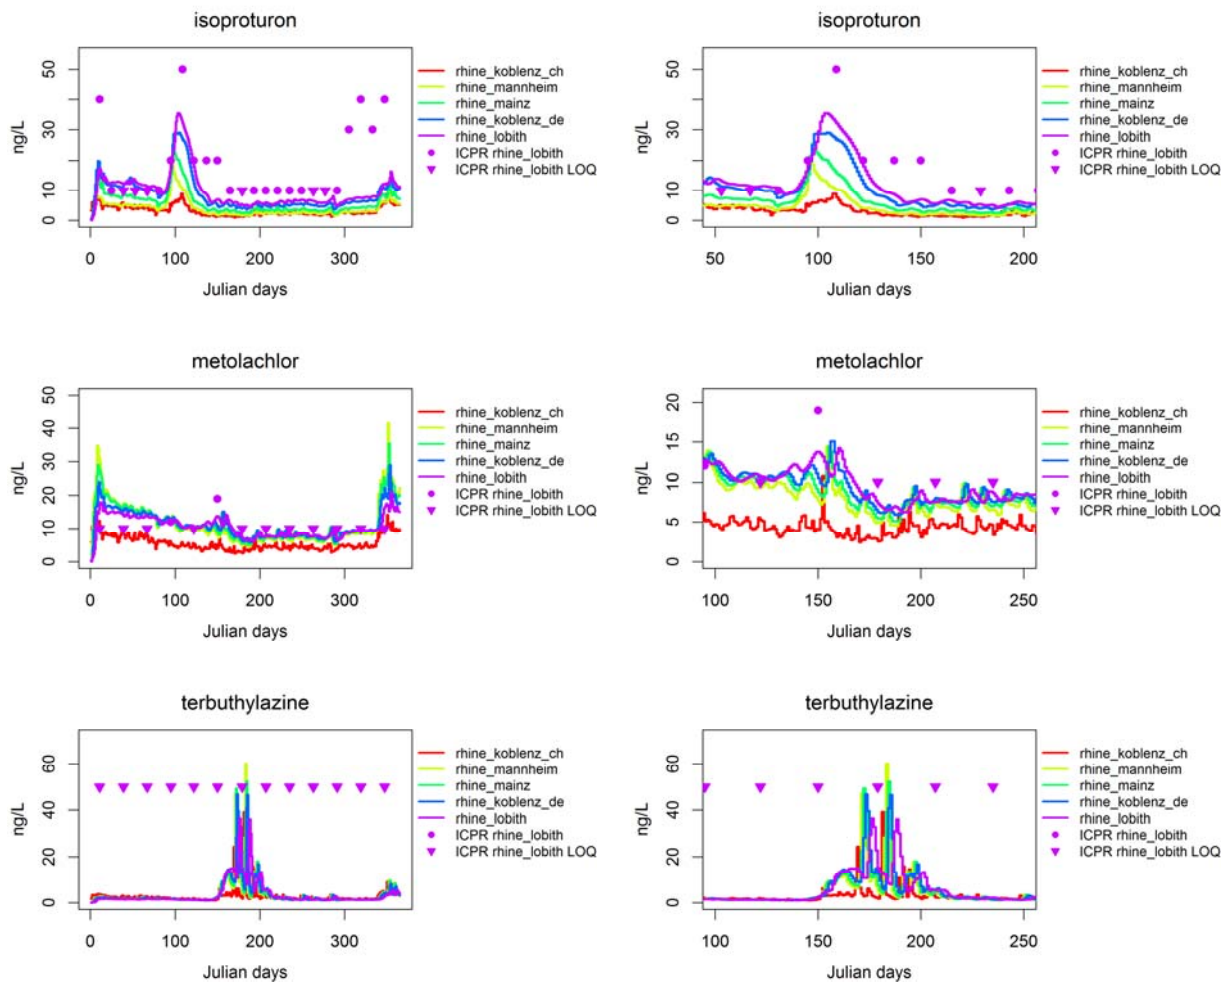

Figure S21 : Modelled concentrations at different points along the Rhine. Note the different axis for metolachlor in the right hand column.

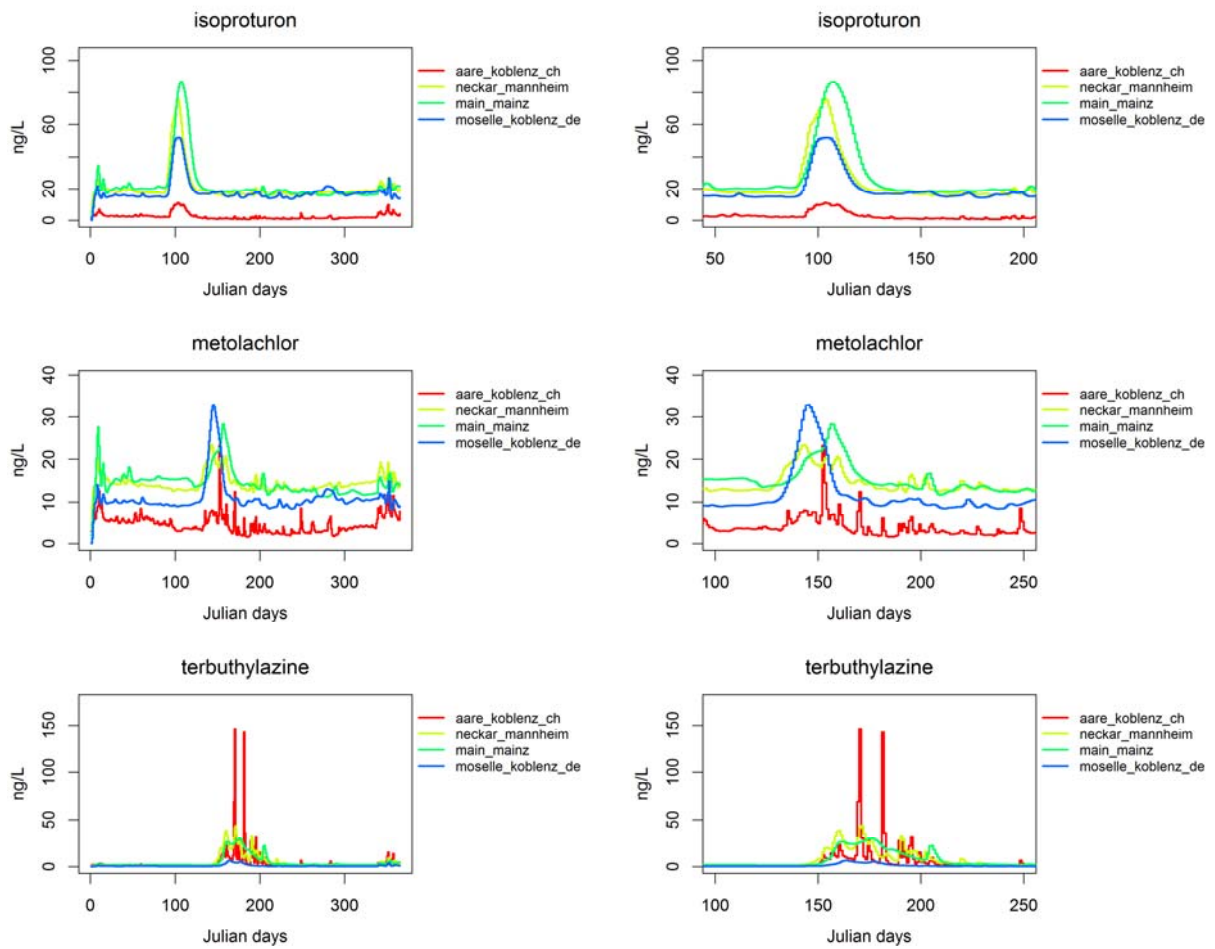

Figure S22 : Modelled isoproturon concentrations at the outlet of the main tributaries to the Rhine.

## Appendix A12: Cumulative distributions of observed and calibrated concentrations

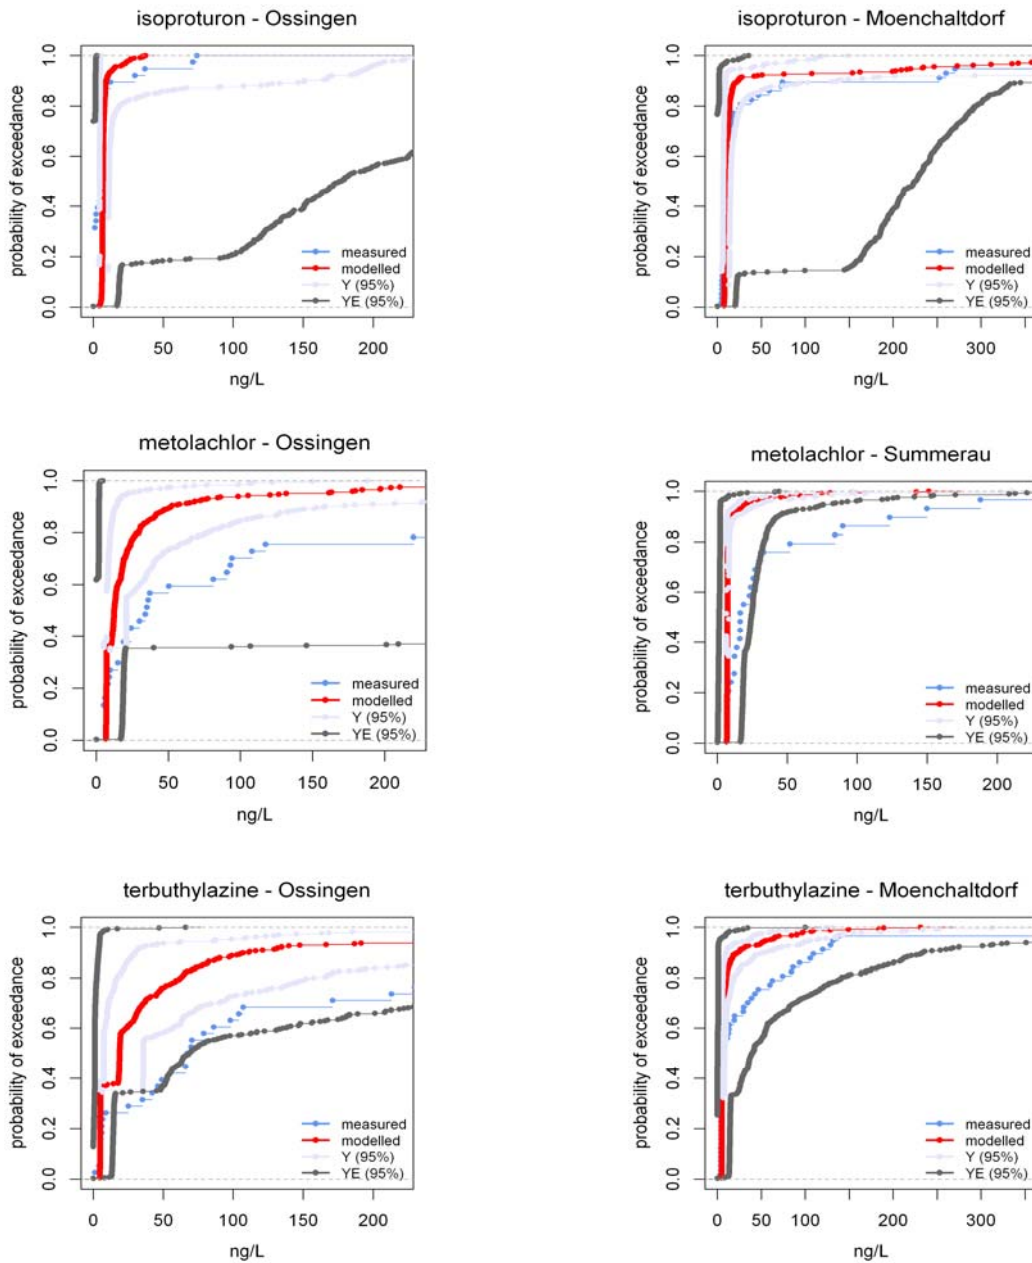

Figure S23 : Cumulative distributions of measured and modelled herbicide concentrations at the calibration sites. Y: parameter uncertainty prediction (95%), YE: parameter uncertainty and structural model error predictions (95%)

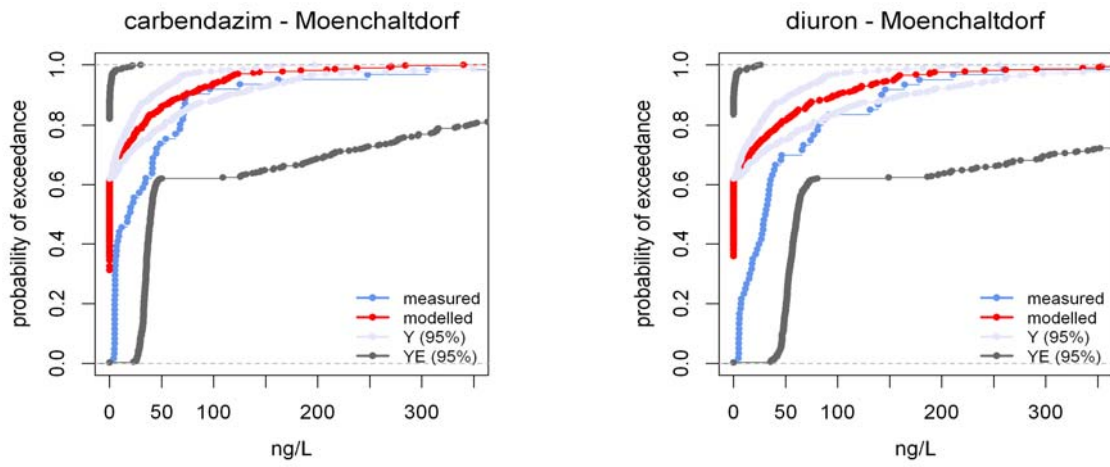

Figure S24 : Cumulative distributions of measured and modelled biocide concentrations at the calibration sites. Y: parameter uncertainty prediction (95%), YE: parameter uncertainty and structural model error predictions (95%).

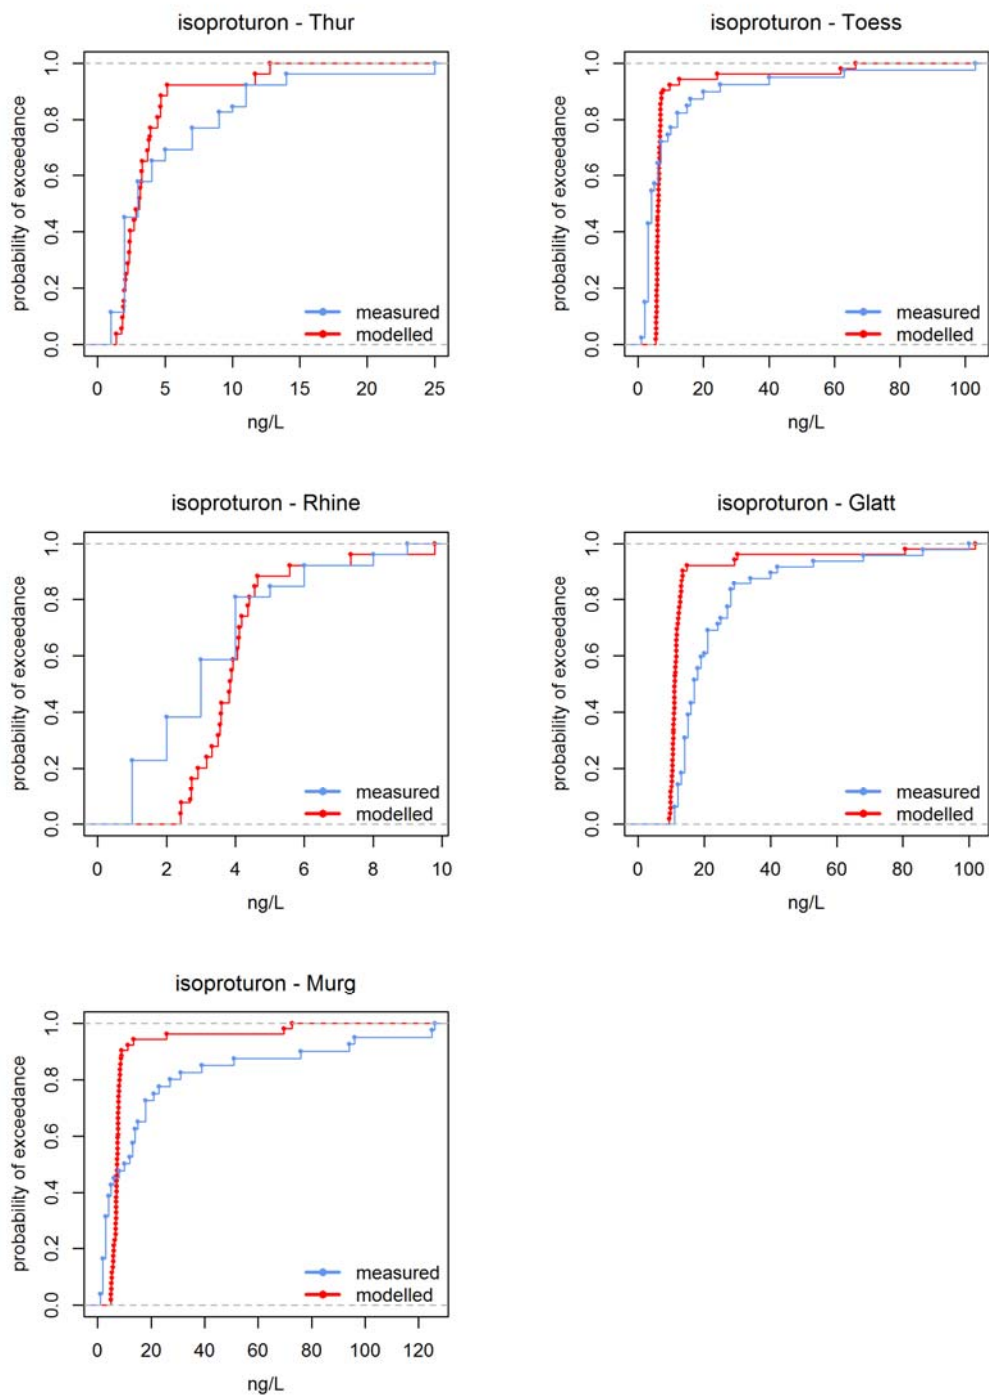

Figure S25 : Cumulative distributions of measured and modelled isoproturon concentrations at the NADUF sites. Calibrated parameters from the Mönchaldorf data set.



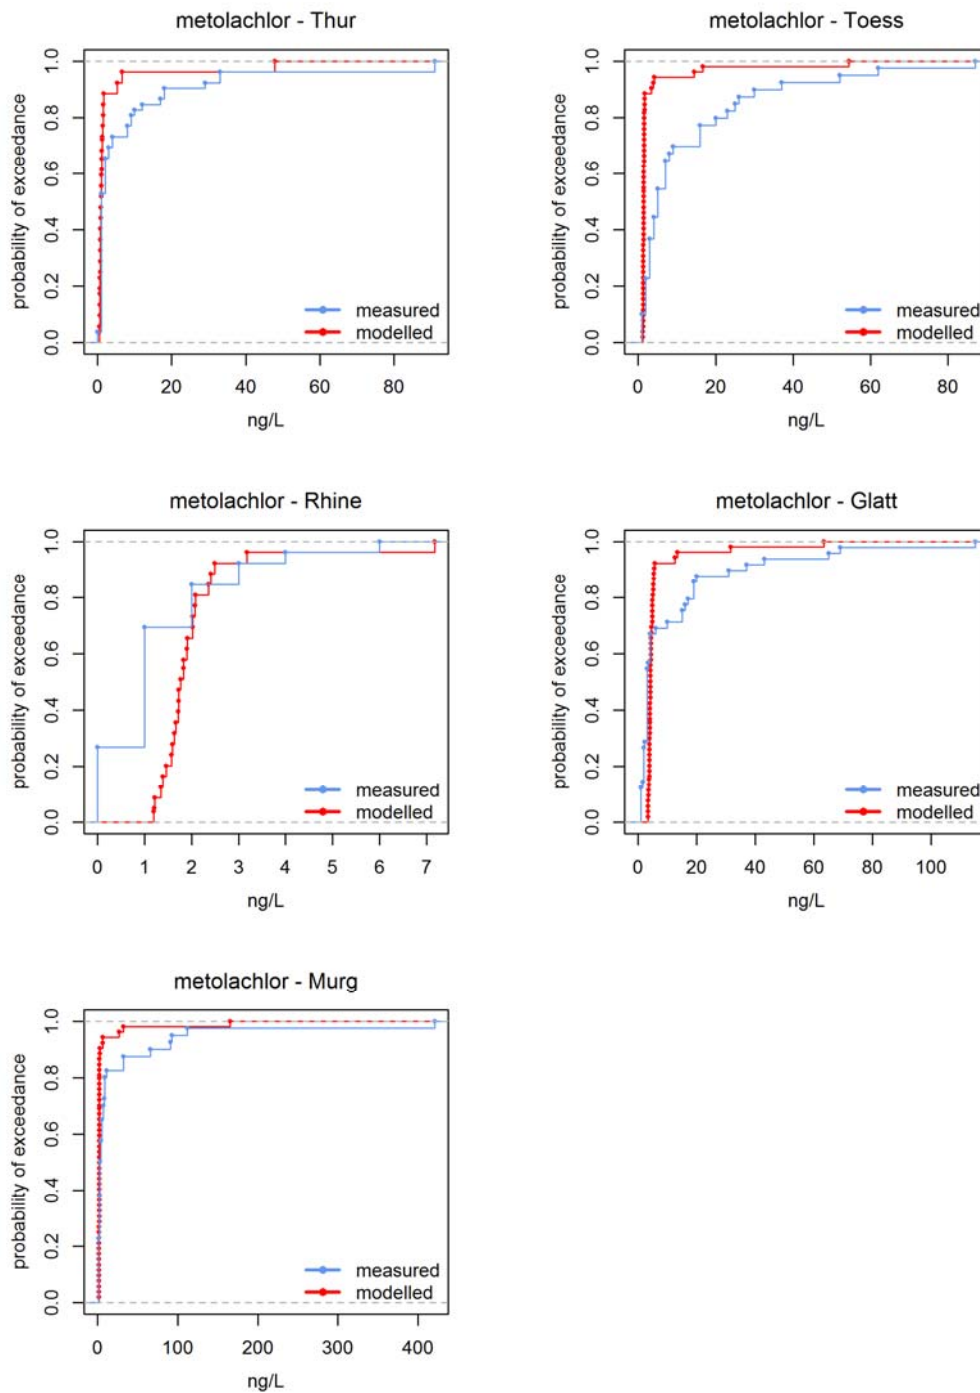

Figure S26 : Cumulative distributions of measured and modelled metolachlor concentrations at the NADUF sites. Calibrated parameters from the Summerau data set.



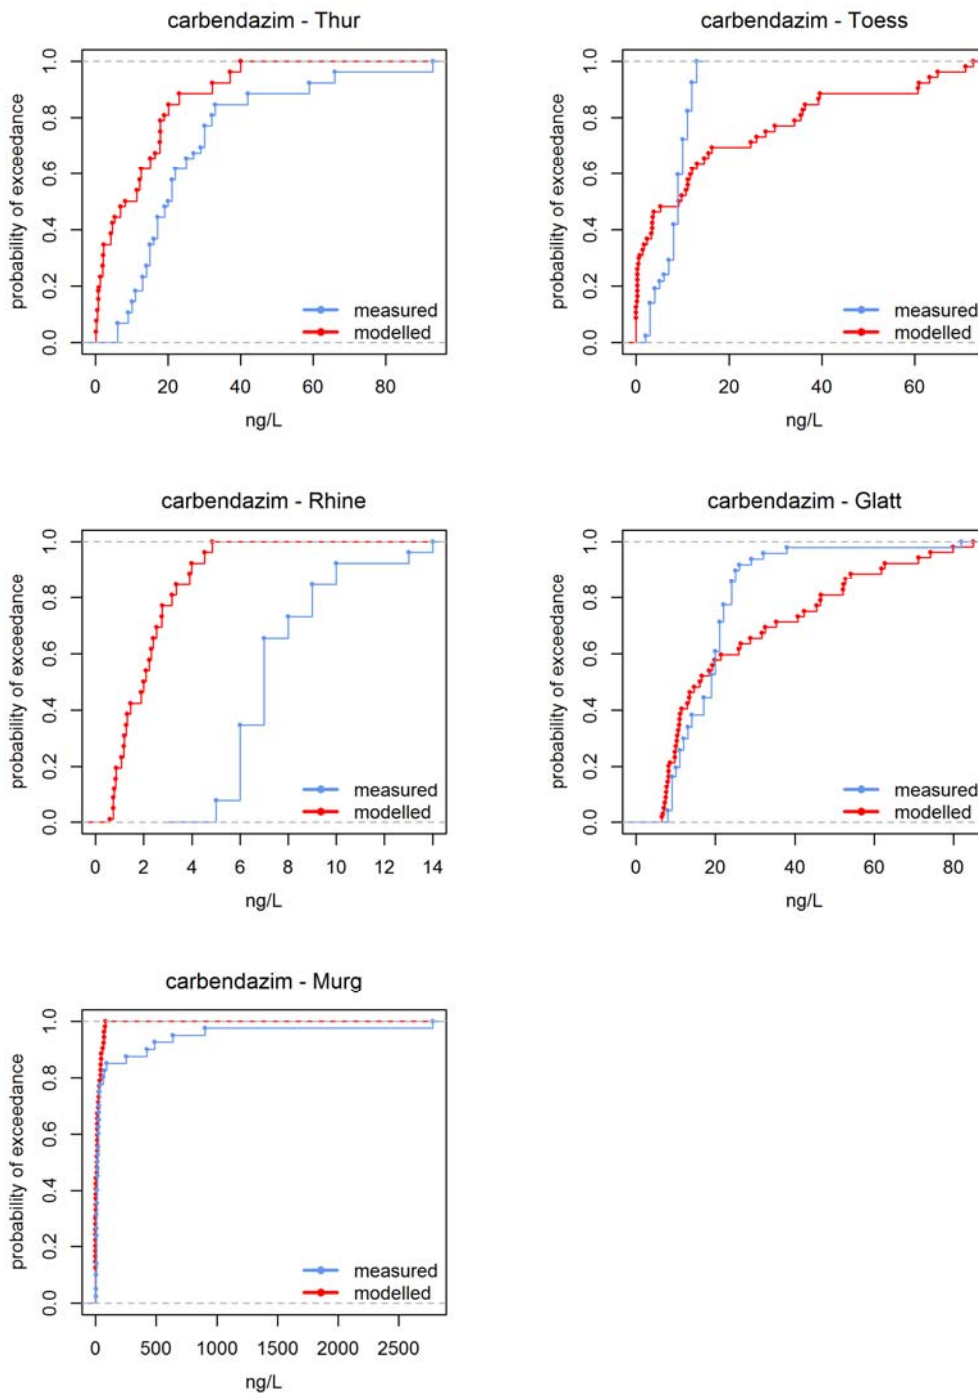

Figure S27 : Cumulative distributions of measured and modelled carbendazim concentrations at the NADUF sites. Calibrated parameters from the Mönchaltorf data set.

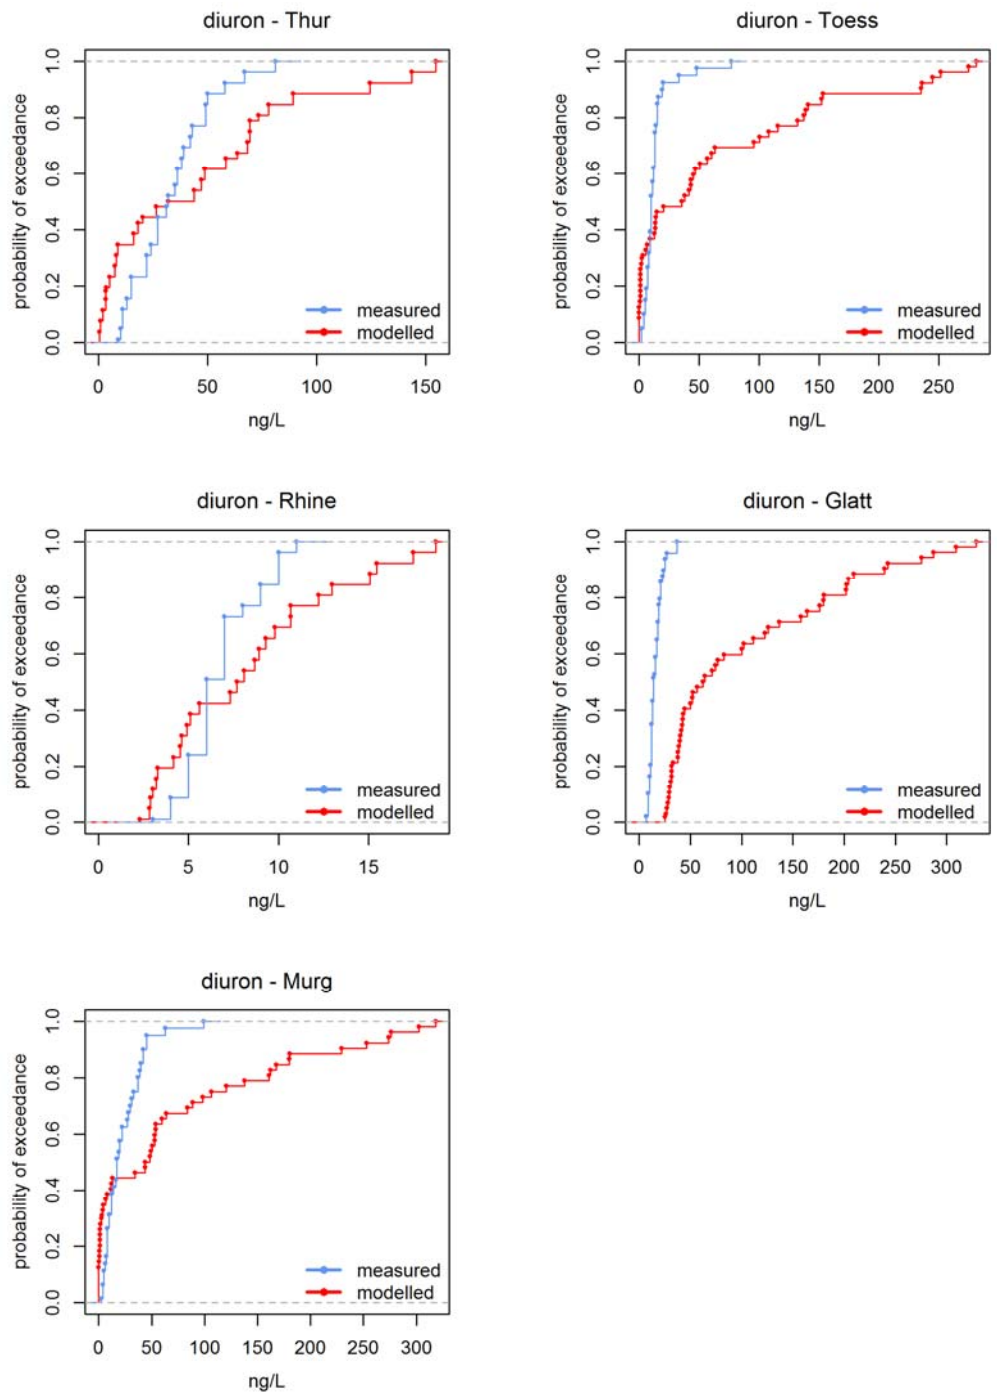

Figure S28 : Cumulative distributions of measured and modelled diuron concentrations at the NADUF sites. Calibrated parameters from the Mönchaldorf data set.

## Appendix A13: Performance metrics

Table S8 Relative RMSE (RRMSE) during calibration for the different compound-site combinations.

|               | Mönchaldorf | Ossingen | Summerau |
|---------------|-------------|----------|----------|
| Isoproturon   | 0.69        | 0.87     | -        |
| Metolachlor   | -           | 0.62     | 0.63     |
| Terbuthylazin | 1.02        | 0.88     | -        |
| Carbendazim   | 0.95        | -        | -        |
| Diuron        | 1.01        | -        | -        |

Table S9 : Percentage of modelled concentrations within the prediction intervals. moe – Mönchaldorf, oss – Ossingen, sum – Summerau.

|                 | Isoproturon |     | S-metolachlor |      | Terbuthylazine |     | Carbendazim | Diuron |
|-----------------|-------------|-----|---------------|------|----------------|-----|-------------|--------|
|                 | moe         | oss | oss           | summ | moe            | oss | moe         | moe    |
| Furtbach        | 100         | 89  | 23            | 34   | 28             | 9   | 67          | 17     |
| Salmsacher Aach | 76          | 100 | 70            | 70   | 30             | 39  | 28          | 0      |
| Surb            | 72          | 94  | 59            | 42   | 80             | 20  | 42          | 6      |
| Limpach         | 100         | 100 | 68            | 23   | 67             | 100 | 19          | 0      |
| Mentue          | 77          | 100 | 53            | 65   | 49             | 41  | 38          | 0      |

Table S10: Overview about the performance metrics for the different simulations.

| Level       | Sub-level   | Routing          | TestSite        | Calibration Site | Compound      | Cmax_obs<br>[ng/L] | Cmax_mod<br>[ng/L] | Cmax_rel | Fold difference | NSE      | Cor   | GRI   | GRI_sorted | PBIAS  | RRMSE |
|-------------|-------------|------------------|-----------------|------------------|---------------|--------------------|--------------------|----------|-----------------|----------|-------|-------|------------|--------|-------|
| Calibration | Calibration | Load aggregation | Mönch           | Mönch            | Isoproturon   | 623                | 541                | 0.87     | 1.15            | 0.51     | 0.73  | 1.93  | 1.59       | -31.1  | 0.69  |
| Calibration | Calibration | Load aggregation | Mönch           | Mönch            | Terbuthylazin | 697                | 334                | 0.48     | 2.09            | -0.05    | 0.21  | 2.38  | 1.37       | -19.7  | 1.02  |
| Calibration | Calibration | Load aggregation | Mönch           | Mönch            | Carbendazim   | 306                | 116                | 0.38     | 2.63            | 0.08     | 0.37  | 5.01  | 3.46       | -37.2  | 0.95  |
| Calibration | Calibration | Load aggregation | Mönch           | Mönch            | Diuron        | 461                | 156                | 0.34     | 2.96            | -0.05    | 0.3   | 5.47  | 3.85       | -34.3  | 1.01  |
| Calibration | Calibration | Load aggregation | Ossingen        | Ossingen         | Isoproturon   | 74                 | 20                 | 0.27     | 3.76            | 0.22     | 0.56  | 3.11  | 2.74       | -9     | 0.87  |
| Calibration | Calibration | Load aggregation | Ossingen        | Ossingen         | Metolachlor   | 2491               | 1180               | 0.47     | 2.11            | 0.61     | 0.85  | 2.05  | 1.37       | -25.1  | 0.62  |
| Calibration | Calibration | Load aggregation | Ossingen        | Ossingen         | Terbuthylazin | 8072               | 1393               | 0.17     | 5.8             | 0.2      | 0.62  | 2.59  | 1.88       | -49.9  | 0.88  |
| Calibration | Calibration | Load aggregation | Summerau        | Summerau         | Metolachlor   | 346                | 151                | 0.44     | 2.29            | 0.59     | 0.85  | 1.82  | 1.41       | -19.3  | 0.63  |
| Validation  | NAWA SPEZ   | Load aggregation | Furtbach        | Mönch            | Isoproturon   | 350                | 372                | 1.06     | 1.06            | -0.62    | 0.58  | 4.04  | 3.8        | 155.7  | 1.21  |
| Validation  | NAWA SPEZ   | Load aggregation | Furtbach        | Mönch            | Terbuthylazin | 340                | 1806               | 5.31     | 5.31            | -33.14   | -0.36 | 10.55 | 4.58       | 296.1  | 5.41  |
| Validation  | NAWA SPEZ   | Load aggregation | Furtbach        | Mönch            | Carbendazim   | 55                 | 89                 | 1.61     | 1.61            | -5.02    | 0.44  | 2.58  | 2.23       | 41.9   | 2.34  |
| Validation  | NAWA SPEZ   | Load aggregation | Furtbach        | Mönch            | Diuron        | 52                 | 424                | 8.15     | 8.15            | -358.88  | 0.52  | 5.55  | 5.56       | 472.6  | 18.09 |
| Validation  | NAWA SPEZ   | Load aggregation | Limpach         | Mönch            | Isoproturon   | 240                | 487                | 2.03     | 2.03            | -0.74    | 0.98  | 1.93  | 1.9        | 75.9   | 1.26  |
| Validation  | NAWA SPEZ   | Load aggregation | Limpach         | Mönch            | Terbuthylazin | 490                | 573                | 1.17     | 1.17            | 0.09     | 0.77  | 2.52  | 2.47       | 42.1   | 0.85  |
| Validation  | NAWA SPEZ   | Load aggregation | Limpach         | Mönch            | Carbendazim   | 33                 | 14                 | 0.43     | 2.33            | 0.06     | 0.72  | 2.42  | 2.42       | -6.9   | 0.79  |
| Validation  | NAWA SPEZ   | Load aggregation | Limpach         | Mönch            | Diuron        | 10                 | 287                | 28.72    | 28.72           | -2492.82 | 0.62  | 21.46 | 24.09      | 2584.8 | 46.71 |
| Validation  | NAWA SPEZ   | Load aggregation | Mentue          | Mönch            | Isoproturon   | 41                 | 1027               | 25.05    | 25.05           | -834.03  | 0.9   | 7.51  | 7.64       | 1948   | 27.4  |
| Validation  | NAWA SPEZ   | Load aggregation | Mentue          | Mönch            | Terbuthylazin | 270                | 385                | 1.43     | 1.43            | -1.78    | 0.7   | 2.52  | 2.48       | 93.3   | 1.52  |
| Validation  | NAWA SPEZ   | Load aggregation | Mentue          | Mönch            | Carbendazim   | 16                 | 30                 | 1.84     | 1.84            | -9.06    | -0.38 | 3.64  | 2.7        | 16.1   | 2.99  |
| Validation  | NAWA SPEZ   | Load aggregation | Mentue          | Mönch            | Diuron        | 30                 | 141                | 4.7      | 4.7             | -51.7    | 0.69  | 9.79  | 10.98      | 784.8  | 6.63  |
| Validation  | NAWA SPEZ   | Load aggregation | Salmsacher Aach | Mönch            | Isoproturon   | 56                 | 120                | 2.14     | 2.14            | -10.03   | 0.01  | 5.44  | 4.04       | 239    | 3.17  |
| Validation  | NAWA SPEZ   | Load aggregation | Salmsacher Aach | Mönch            | Terbuthylazin | 130                | 2597               | 19.98    | 19.98           | -489.72  | 0.72  | 4.46  | 3.77       | 691.2  | 20.88 |
| Validation  | NAWA SPEZ   | Load aggregation | Salmsacher Aach | Mönch            | Carbendazim   | 43                 | 141                | 3.29     | 3.29            | -20.17   | 0.27  | 3.78  | 3.62       | 260.8  | 4.34  |
| Validation  | NAWA SPEZ   | Load aggregation | Salmsacher Aach | Mönch            | Diuron        | 52                 | 677                | 13.01    | 13.01           | -387.43  | 0.49  | 12.65 | 17.07      | 1434.5 | 18.79 |
| Validation  | NAWA SPEZ   | Load aggregation | Surb            | Mönch            | Isoproturon   | 220                | 490                | 2.23     | 2.23            | -10.25   | -0.02 | 3.69  | 2.35       | 219.6  | 3.2   |
| Validation  | NAWA SPEZ   | Load aggregation | Surb            | Mönch            | Terbuthylazin | 630                | 981                | 1.56     | 1.56            | -0.56    | 0.9   | 2.62  | 2.62       | 105.1  | 1.14  |
| Validation  | NAWA SPEZ   | Load aggregation | Surb            | Mönch            | Carbendazim   | 65                 | 44                 | 0.68     | 1.47            | -1.87    | -0.41 | 3.61  | 2.67       | 39.5   | 1.61  |
| Validation  | NAWA SPEZ   | Load aggregation | Surb            | Mönch            | Diuron        | 22                 | 211                | 9.59     | 9.59            | -513.61  | 0.54  | 9.84  | 10.26      | 1079.4 | 21.63 |
| Validation  | NAWA SPEZ   | Load aggregation | Furtbach        | Ossingen         | Isoproturon   | 350                | 30                 | 0.09     | 11.73           | -0.12    | -0.02 | 2.84  | 1.92       | -71.9  | 1     |
| Validation  | NAWA SPEZ   | Load aggregation | Furtbach        | Ossingen         | Metolachlor   | 790                | 3111               | 3.94     | 3.94            | -20.18   | -0.26 | 13.19 | 5.41       | 165.4  | 4.39  |
| Validation  | NAWA SPEZ   | Load aggregation | Furtbach        | Ossingen         | Terbuthylazin | 340                | 3426               | 10.08    | 10.08           | -114.69  | -0.35 | 11.63 | 5.47       | 612.4  | 9.96  |
| Validation  | NAWA SPEZ   | Load aggregation | Limpach         | Ossingen         | Isoproturon   | 240                | 31                 | 0.13     | 7.83            | -0.16    | 0.76  | 3.14  | 3.16       | -78.1  | 1.03  |
| Validation  | NAWA SPEZ   | Load aggregation | Limpach         | Ossingen         | Metolachlor   | 530                | 1199               | 2.26     | 2.26            | -4.47    | 0.84  | 4.14  | 3.55       | 93.6   | 2.23  |
| Validation  | NAWA SPEZ   | Load aggregation | Limpach         | Ossingen         | Terbuthylazin | 490                | 1564               | 3.19     | 3.19            | -16.55   | 0.76  | 4.41  | 4.42       | 272.5  | 3.75  |
| Validation  | NAWA SPEZ   | Load aggregation | Mentue          | Ossingen         | Isoproturon   | 41                 | 56                 | 1.38     | 1.38            | 0.78     | 0.98  | 1.97  | 1.96       | 41.8   | 0.44  |
| Validation  | NAWA SPEZ   | Load aggregation | Mentue          | Ossingen         | Metolachlor   | 160                | 758                | 4.74     | 4.74            | -61.76   | 0.56  | 4.44  | 4.13       | 205.4  | 7.52  |
| Validation  | NAWA SPEZ   | Load aggregation | Mentue          | Ossingen         | Terbuthylazin | 270                | 876                | 3.24     | 3.24            | -29.68   | 0.45  | 4.41  | 4.49       | 358.2  | 5.05  |
| Validation  | NAWA SPEZ   | Load aggregation | Salmsacher Aach | Ossingen         | Isoproturon   | 56                 | 16                 | 0.29     | 3.45            | -0.06    | 0.02  | 3.21  | 2.71       | -23.4  | 0.98  |
| Validation  | NAWA SPEZ   | Load aggregation | Salmsacher Aach | Ossingen         | Metolachlor   | 250                | 3082               | 12.33    | 12.33           | -141.69  | 0.63  | 4.72  | 3.89       | 452.9  | 11.39 |
| Validation  | NAWA SPEZ   | Load aggregation | Salmsacher Aach | Ossingen         | Terbuthylazin | 130                | 2215               | 17.04    | 17.04           | -324.3   | 0.68  | 4.82  | 4.25       | 562.9  | 17    |
| Validation  | NAWA SPEZ   | Load aggregation | Surb            | Ossingen         | Isoproturon   | 220                | 27                 | 0.12     | 8.18            | -0.14    | -0.01 | 2.05  | 2.03       | -68.8  | 1.02  |
| Validation  | NAWA SPEZ   | Load aggregation | Surb            | Ossingen         | Metolachlor   | 1100               | 1752               | 1.59     | 1.59            | -2.09    | 0.18  | 5.9   | 4.14       | 6.3    | 1.67  |
| Validation  | NAWA SPEZ   | Load aggregation | Surb            | Ossingen         | Terbuthylazin | 630                | 2974               | 4.72     | 4.72            | -25.43   | 0.82  | 5.17  | 5.29       | 424.7  | 4.69  |
| Validation  | NAWA SPEZ   | Load aggregation | Furtbach        | Summerau         | Metolachlor   | 790                | 711                | 0.9      | 1.11            | -0.9     | 0.01  | 5.73  | 4.44       | -36.5  | 1.31  |
| Validation  | NAWA SPEZ   | Load aggregation | Limpach         | Summerau         | Metolachlor   | 530                | 454                | 0.86     | 1.17            | -1.52    | 0.03  | 6.08  | 3.59       | -14.5  | 1.51  |
| Validation  | NAWA SPEZ   | Load aggregation | Mentue          | Summerau         | Metolachlor   | 160                | 232                | 1.45     | 1.45            | -2.65    | 0.4   | 3.94  | 3.45       | -4.1   | 1.81  |
| Validation  | NAWA SPEZ   | Load aggregation | Salmsacher Aach | Summerau         | Metolachlor   | 250                | 292                | 1.17     | 1.17            | -1.34    | -0.07 | 3.78  | 2.56       | -14.5  | 1.46  |
| Validation  | NAWA SPEZ   | Load aggregation | Surb            | Summerau         | Metolachlor   | 1100               | 517                | 0.47     | 2.13            | -0.58    | 0.52  | 6.11  | 6.62       | -70.4  | 1.19  |

Table S10 (cont.): Overview about the performance metrics for the different simulations.

| Level      | Sub-level | Routing          | TestSite       | Calibration Site | Compound      | Cmax_obs | Cmax_mod | Cmax_rel | Fold difference | NSE     | Cor   | GRI  | GRI_sorted | PBIAS | RRMSE |
|------------|-----------|------------------|----------------|------------------|---------------|----------|----------|----------|-----------------|---------|-------|------|------------|-------|-------|
|            |           |                  |                |                  |               | [ng/L]   | [ng/L]   |          |                 |         |       |      |            |       |       |
| Validation | NADUF     | Load aggregation | Thur           | Mönch            | Isoproturon   | 14       | 14       | 1.01     | 1.01            | -0.08   | 0.3   | 2.29 | 1.49       | -32.2 | 1.04  |
| Validation | NADUF     | Load aggregation | Thur           | Summerau         | Metolachlor   | 91       | 70       | 0.77     | 1.3             | 0.75    | 0.92  | 3.17 | 2.82       | -54.5 | 0.5   |
| Validation | NADUF     | Load aggregation | Thur           | Mönch            | Carbendazim   | 93       | 32       | 0.34     | 2.95            | -0.57   | 0.49  | 4.51 | 4.57       | -67.9 | 1.25  |
| Validation | NADUF     | Load aggregation | Thur           | Mönch            | Diuron        | 81       | 122      | 1.51     | 1.51            | -0.16   | 0.77  | 2.78 | 2.52       | -4.5  | 1.08  |
| Validation | NADUF     | Load aggregation | Rhine-Rekingen | Mönch            | Isoproturon   | 8        | 10       | 1.25     | 1.25            | 0.26    | 0.64  | 1.81 | 1.68       | 23.7  | 0.86  |
| Validation | NADUF     | Load aggregation | Rhine-Rekingen | Summerau         | Metolachlor   | 6        | 8        | 1.27     | 1.27            | 0.29    | 0.76  | 3.36 | 3.48       | 54.2  | 0.84  |
| Validation | NADUF     | Load aggregation | Rhine-Rekingen | Mönch            | Carbendazim   | 14       | 5        | 0.34     | 2.95            | -6.09   | 0.56  | 4.05 | 4.03       | -72   | 2.66  |
| Validation | NADUF     | Load aggregation | Rhine-Rekingen | Mönch            | Diuron        | 11       | 18       | 1.67     | 1.67            | -3.4    | 0.58  | 1.6  | 1.39       | 20.6  | 2.1   |
| Validation | NADUF     | Load aggregation | Murg           | Mönch            | Isoproturon   | 126      | 71       | 0.57     | 1.76            | 0.14    | 0.53  | 3    | 2.53       | -52.3 | 0.92  |
| Validation | NADUF     | Load aggregation | Murg           | Summerau         | Metolachlor   | 421      | 304      | 0.72     | 1.39            | 0.77    | 0.93  | 2.94 | 2.64       | -56.6 | 0.48  |
| Validation | NADUF     | Load aggregation | Murg           | Mönch            | Carbendazim   | 2779     | 70       | 0.03     | 39.73           | -0.1    | -0.06 | 6.19 | 6.09       | -89.6 | 1.05  |
| Validation | NADUF     | Load aggregation | Murg           | Mönch            | Diuron        | 99       | 271      | 2.74     | 2.74            | -18.37  | 0.35  | 5.12 | 4.37       | 164.1 | 4.4   |
| Validation | NADUF     | Load aggregation | Töss           | Mönch            | Isoproturon   | 103      | 65       | 0.63     | 1.58            | 0.44    | 0.66  | 2.26 | 1.87       | -10.3 | 0.74  |
| Validation | NADUF     | Load aggregation | Töss           | Summerau         | Metolachlor   | 87       | 100      | 1.15     | 1.15            | 0.35    | 0.75  | 3.54 | 3.57       | -63.1 | 0.81  |
| Validation | NADUF     | Load aggregation | Töss           | Mönch            | Carbendazim   | 13       | 65       | 5        | 5               | -42     | 0.52  | 4.06 | 3.83       | 125.4 | 6.56  |
| Validation | NADUF     | Load aggregation | Töss           | Mönch            | Diuron        | 77       | 252      | 3.27     | 3.27            | -49.76  | 0.36  | 6.27 | 5.53       | 449.4 | 7.12  |
| Validation | NADUF     | Load aggregation | Glatt          | Mönch            | Isoproturon   | 53       | 102      | 1.92     | 1.92            | -0.42   | 0.21  | 1.93 | 1.77       | -43.9 | 1.19  |
| Validation | NADUF     | Load aggregation | Glatt          | Summerau         | Metolachlor   | 115      | 88       | 0.77     | 1.3             | 0.03    | 0.38  | 2.51 | 2.29       | -44.1 | 0.98  |
| Validation | NADUF     | Load aggregation | Glatt          | Mönch            | Carbendazim   | 82       | 71       | 0.87     | 1.15            | -2.06   | 0.39  | 1.91 | 1.49       | 34.4  | 1.75  |
| Validation | NADUF     | Load aggregation | Glatt          | Mönch            | Diuron        | 37       | 276      | 7.45     | 7.45            | -296.14 | 0.63  | 4.77 | 4.77       | 513.6 | 17.24 |
| Validation | IRMS      | Aquasim          | Basel          | Mönch            | Isoproturon   | 29       | 9        | 0.32     | 3.16            | 0.22    | 0.67  | 1.84 | 1.51       | -37.2 | 0.88  |
| Validation | IRMS      | Aquasim          | Basel          | Summerau         | Metolachlor   | 52       | 14       | 0.27     | 3.71            | -0.82   | 0.28  | 2.36 | 2.16       | -56.8 | 1.35  |
| Validation | IRMS      | Aquasim          | Basel          | Mönch            | Terbuthylazin | 37       | 70       | 1.9      | 1.9             | -3.28   | 0.04  | 2.93 | 2.41       | -29.5 | 2.1   |
| Validation | IRMS      | Aquasim          | Basel          | Mönch            | Carbendazim   | 11       | 12       | 1.13     | 1.13            | -8.04   | 0.27  | 2.74 | 2.59       | -39.8 | 3.01  |
| Validation | IRMS      | Aquasim          | Basel          | Mönch            | Diuron        | 14       | 44       | 3.14     | 3.14            | -49.22  | 0.12  | 2.39 | 2.07       | 105.2 | 7.09  |
| Validation | IRMS      | Load aggregation | Basel          | Mönch            | Isoproturon   | 29       | 10       | 0.33     | 3.05            | 0.35    | 0.84  | 1.64 | 1.49       | -35.2 | 0.81  |
| Validation | IRMS      | Load aggregation | Basel          | Summerau         | Metolachlor   | 52       | 21       | 0.4      | 2.51            | -0.71   | 0.33  | 2.23 | 2.05       | -54.2 | 1.31  |
| Validation | IRMS      | Load aggregation | Basel          | Mönch            | Terbuthylazin | 37       | 173      | 4.68     | 4.68            | -12.23  | -0.02 | 2.16 | 1.54       | 6.7   | 3.64  |
| Validation | IRMS      | Load aggregation | Basel          | Mönch            | Carbendazim   | 11       | 37       | 3.39     | 3.39            | -10.08  | 0.23  | 2.07 | 1.87       | -21.6 | 3.33  |
| Validation | IRMS      | Load aggregation | Basel          | Mönch            | Diuron        | 14       | 144      | 10.31    | 10.31           | -121.41 | -0.04 | 2.52 | 2.34       | 161.3 | 11.06 |

## References:

European Environment Agency EEA: Waterbase-UWWTD (Urban Waste Water Treatment Directive) database, in, Available from: <http://www.eea.europa.eu/data-and-maps/data/waterbase-uwtd-urban-waste-water-treatment-directive-3>. Accessed at 17 October 2014  
European Environmental Agency, 2012.

Eurostat: GEOSTAT (2011) Quality documentation of national population grid data. eurostat and European Forum for Geography and Statistics. GEOSTAT-EFGS\_grid\_POP\_1K\_2011\_V\_2\_0\_1\_QA, in, 2011.

Herlyn, A., and Maurer, M.: Status quo der Schweizer Abwasserentsorgung, GWA, 1 - 6, 2007.

Swiss Federal Office for the Environment (FOEN): Einzugsgebietsgliederung Schweiz EZGG-CH©2012, in, Swiss Federal Office for the Environment. , Bern: , 2012.

Swiss Federal Statistical Office FSO: Census of agricultural enterprises (Landwirtschaftliche Betriebszählung) 2010, Neuchâtel, Switzerland, 2011.

Swiss Federal Statistical Office FSO: Land use statistics (Arealstatistik) 2004/09, Neuchâtel, SwitzerlandNOLU04/20120821, 2012.

Swisstopo: Vector25@2007, (reproduced with permission of swisstopo / JA100119), in, Federal Office for Topography, Bern, 2007.

Vogt, J., Soille, P., De Jager, A., Rimaviciute, E., Mehl, W., Foisneau, S., Bodis, K., Dusart, J., Paracchini, M. L., Haastrup, P., and others: A pan-European river and catchment database, European Commission, EUR, 22920, 120, 2007.
